# Supplementary material for: Self-deployable contracting-cord metamaterials with tunable mechanical properties
Source: Royal Society of Chemistry journal article supplement (doi:10.1039/d4mh00584h), 2024-01-01
Supplement: d4mh00584h1.pdf [file d4mh00584h1.pdf]

## Supplementary Material

### Self-deployable contracting-cord metamaterials with tunable mechanical properties

Wenzhong Yan,<sup>1,2\*</sup> Talmage Jones,<sup>2</sup> Christopher L. Jawetz,<sup>2,3</sup> Ryan H. Lee,<sup>2</sup>

Jonathan B. Hopkins,<sup>2</sup> and Ankur Mehta<sup>1</sup>

<sup>1</sup> Electrical and Computer Engineering Department, UCLA, USA.

<sup>2</sup> Mechanical and Aerospace Engineering Department, UCLA, USA.

<sup>3</sup> Woodruff School of Mechanical Engineering, Georgia Tech, USA.

\*To whom correspondence should be addressed:

### Supplementary Text S1 Comparison of the mechanical behavior of beams with the proposed conical interface versus the conventional non-concave interface

#### Bead contact behavior observations

Here, we use beams with 90° beads to represent the conventional tendon-driven non-concave jamming. We use beams with 40° beads to represent the proposed beads with conical interfaces. The beams studied are subjected to 50 N of initially applied string tension, and have beads with a Young's modulus of 0.571 GPa, 0.05 mm edge radius, a bead-bead friction coefficient of 0.15, and other contact friction coefficient of 0.1. As Fig. S23a shows, the proposed concavo-convex beam has two contact areas at all bead-bead interfaces during bending. These two contact areas can improve the rigidity of the beam even under large indentation (Fig. S23b and Supplementary Movies S3 and S13). This is achieved via geometric interlocking, which causes the stress to be distributed throughout the beam.

In contrast, the non-concave beads have only one contact area between neighboring beads and the beam's deformation is mainly pivoting around the bottom edge of the end bead (see Supplementary Movie S14 and S15). Consequently, the stiffness decreases dramatically after a certain amount of bending indentation. Such variations in stiffness could lead to significant

challenges in practical applications. In addition, the stress concentration on the bottom edge of beads might result in more extensive damage to individual beads. These one-point contact areas are also intrinsically unstable to environmental disturbances, including vibration and impact, which might cause undesired slips and thus large rigidity drop (60).

### **Insight from finite element studies**

**Observation of contact areas and stress distributions in stress plot animations.** Figures S24 and S25 use von Mises stress plots to illustrate the stability advantage provided by a concavo-convex CCPJ beam over a traditional CCPJ beam. Full animations of the pretensioning, 20 mm deflection, and return cycle can be seen in Supplementary Movies S13 and S14. Supplementary Movies S3 and S15 are animations of the cross-section view shown in the figures. The cross-section view cuts through the center of the beam down its length. The high stress concentration at the tip is a result of the string being secured via beam multi-point constraints (MPCs) at that location. In both models, stresses are highest at the bottom side of the bead closest to the fixed end bead, and then the stresses slowly decrease along the length of the beam. On the 40° beam, high stresses are also present where the tip of the bead contacts the concave conical surface of the bead in front of it. These stresses also decrease along the length of the bead. The presence of these stresses indicates a higher presence of material deformation in the beads, both due to bending of the tip area and tangential frictional forces. The overall behavior of the 40° beam is characterized by a more distributed curvature, while that of the 90° beam resembles more of a hinge with rigid body rotation of the last 10 beads against the fixed end bead. The 40° beam exhibits sliding along the bead tip surface and distributed stresses in the material, while the 90° beam exhibits very little sliding and only a localized compression where the largely rigid body rotation occurs.

**Quantification of friction effects in energy plots.** We confirmed the observed mechanics by

plotting the transfer of energy within the system over the full 20 mm range of deflection and return. Fig. S28a shows the energy dissipated due to friction in the whole system for 40° beam, along with the internal energy stored due to strain in all beads and in the string. The result for 90° beam is in Fig. S28b.

The plots clearly show that the difference in mechanical behavior between the proposed beam and traditional beams is strongly influenced by friction. We see about 0.013 J of energy consumed by friction for a 40° bead, while a 90° bead loses around 0.001 J due to friction. The energy stored due to elastic strain in the beads is also about double in the 40° beam. Also notable is how energy in the beads returns to 0 for a 90° beam, but in the 40° case, a small amount remains. This effect can be attributed to the frictional forces equilibrating with the string tension, which attempts to pull the beam back to its original position. As a result, the 40° bead hysteresis curves return to a 0 N reaction force before the indenter fully returns to its original position. This agrees with the experiment results (Supplementary Movie S2) and animations, which show that the beam does not completely return to its original state and a small amount of compressive stress remains in the concavo-convex beads. The traditional 90° beams do not exhibit this behavior, and thus the energy stored in the beads returns to 0 J (Supplementary Movie S16).

**Discussion of finite element analysis.** The presence of residual stresses and strain energy in the proposed beads indicates that they may make it harder to straighten out the beam before subsequent bending cycles. The friction maintains strain in the beads, preventing the beam from returning to its complete original state. Note that this effect is distinct from the alignment accuracy in Fig. 3, which refers to alignment upon deploying the beam (for which angled beads provide an advantage in facilitating alignment). However, the largely consistent stiffness response for the concavo-convex beams provides stability (Fig. S26). A traditional 90° beam, has a very stiff initial response and then dramatically shifts to a low stiffness, while the angled

beads create a more prolonged initial stiffness with a more damped return.

## **Supplementary Text S2 Parametric finite element studies**

Using finite element (FE) models, we studied the underlying effects of various parameters that are difficult to study experimentally. The results discussed here show trends caused by changes in the following parameters: friction coefficients, bead edge radius, and the Young's modulus of the bead material. Different trends were observed in concavo-convex beads with a cone angle versus non-concave beads with a traditional flat surface are also shown. Here, we study CCPJ beams deflected to 20 mm with 40° cone angle beads and 90° cone angle beads.

### **Determination of friction coefficients at contact interactions**

The coefficients of friction (CoF) are difficult to characterize experimentally due to the complex geometry and interaction. Through parametric studies of our FE model, we were able to determine appropriate values. This process also serves to demonstrate the influence of CoF on the mechanical response of the beams.

In the quasistatic bending model, there are three contact interactions of interest: indenter-bead, string-bead, and bead-bead. We assigned each a friction coefficient for tangential motion and studied the effects of varying that coefficient. String tension, bead edge radius, and Young's modulus were kept consistent through all iterations of the friction study with values of 50 N, 0.05 mm and 0.571 GPa, respectively.

Variation of the bead-bead friction coefficient resulted in moderate changes in stiffness and hysteresis (59). We varied the coefficient from 0.1 to 0.2 at an interval of 0.05 and extracted the force-displacement curves (Fig. S26a). After calculating the apparent bending modulus and loss factor corresponding to each case, we determined that the curve corresponding to a value of 0.15 is the best fit for the experimental data (Supplementary Table S2). Unless otherwise stated, this value is assumed to be the default. We also observed that as the bead-



bead friction coefficient increases, the stiffness and the loss factor of the beam both increase. Additionally, residual deflection and stresses in the fully returned beam increase. This agrees with the sliding observed in the stress plot animations (Fig. S24 and Supplemental Movie S3). When sliding occurs, an increased friction coefficient corresponds to an increased stiffness and a larger amount of energy loss in the hysteresis loop.

In the cases of the indenter-bead and string-bead contact interactions, varying the friction coefficient between 0.1 and 0.2 had a negligible effect on the force-displacement curve. However, completely removing these frictional effects caused instability in the FE model. We therefore assigned a value of 0.1 to dampen excessive rigid body movement at these locations.

For beams with  $90^\circ$  cone angles, varying the bead-bead friction coefficient over the same range also had a negligible effect (Fig. S27a). This validates the idea that the bending mechanics of such beams relies less on frictional contact and more on a pivoting motion stiffened by the string.

### **Effect of bead edge radius**

Based on our analysis, we found that bead edges have a moderate impact on beam behavior. As shown in Fig. S1, the radius is defined as  $R_E$ . We empirically determined a minimum radius of  $R_E$  to be 0.5 mm: a contact with sharper corner can cause instability in FE models. We varied this radius between 0.5 mm and 1.2 mm in  $40^\circ$  beams and extracted force-displacement curves (Fig. S26b). As the radius decreases, the overall stiffness of the CCPJ beam increases significantly, approaching the experimental behavior of beams with sharp-edged beads. This stiffening phenomenon is commonly observed in particle jamming (60). Energy loss within the hysteresis loop appears to be largely unaltered.

The same effect of decreasing radius causing an increased overall stiffness is observed in  $90^\circ$  cone angle beams (Fig. S27b), though the effect is far less pronounced as it is in the  $40^\circ$  beams.

### **Effect of bead's Young's modulus**

We discovered that the Young's modulus of beads significantly affects the overall beam behavior under bending tests. We varied the modulus between 0.571 GPa and 100 GPa in a 40° beam and extracted force-displacement curves (Fig. S26c). As the modulus increases, the overall stiffness of the CCPJ beam increases. At high modulus values, the beam appears to approach an upper limit of stiffness, converging on a behavior where an extremely high initial stiffness is followed by a sudden transition to a low stiffness. It follows that a model with perfectly rigid beads would exhibit behavior similar to the high modulus cases, featuring dramatic beam stiffness changes and clear separation between beads. Therefore, the Young's modulus of beads should be considered in the model to accurately capture the behaviors of beams.

### **Discussion on model accuracy**

In the force-displacement curves, we see that the FE models agree fairly well with the experimental data obtained on the universal testing machine. Experimental data in each plot is the average of our quasistatic bending test data for 50 N of initially applied string tension. Decreasing the radius of the bead edges especially lines the data up well with the experimental data. It is difficult to run a model with sharper edges than 0.5 mm as an extremely fine local mesh is required for computational stability, which comes at a high cost in terms of computational efficiency.

Since our string material model in the simulations does not account for the effects of material hysteresis, some discrepancy with the experimental data is expected, especially regarding damping capability. The effect of string hysteresis is most apparent in the simulations of beams with 90-degree beads. The FE model shows minimal damping effect for these beams, much less than in the corresponding experimental results. Increasing the friction coefficient in these simulations has a negligible effect on damping, as shown in Fig. S27a. Therefore, the discrepancy with experimental data in damping must be due to material hysteresis. The FE model's

energy plots confirm this by showing that 90-degree beams are especially reliant on the string's elasticity, rather than friction, to provide stiffness to the structure (Fig. S28b). Thus we also know that string hysteresis accounts for some discrepancy in other beam models. Friction is the principal source of hysteresis in the 40° beams, and its effects are included in the model. The unaccounted for hysteresis can be considered a result of the string material.

Fabrication imperfection, along with imperfect initial contact may account for the discrepancies seen between FE and experimental results in Fig. 2C. Prior to the first load step in the FE model, contact between beads is initiated artificially by making strain free adjustments to the geometry of adjacent beads. Thus, a significant stiffness is immediately exhibited as the beads begin perfectly aligned. Experimentally, misalignment due to imperfections in assembly and bead geometry causes low stiffness rigid body movement as the beads and string settle into place. This effect is more pronounced at lower string tensions.

### **Supplementary Text S3 Test rig design**

Figure S29 is the setup for tensile tests, which is used as an example to show the typical structures of test rigs. We customized a rigid support frame constructed from aluminum T-slotted rails (80 mm × 80 mm, 80/20) and connectors. This frame was securely attached to the base of the Instron using bolts, ensuring the rigidity of the test rig. Due to the limited space within Instron, we had to redirect the tension through a low-friction pulley while the beam was orientated vertically to align with the moving direction of the Instron. Thus, the force stand was solidly fixed onto a horizontal rail of the frame with its push head connected to the nylon string of 380 mm. Then the test sample was assembled onto the test rig with the top bead fixed on a customized 3D printed connector and end bead attached onto the base. During the pretension state, the push head was moved to certain position to reach desired tension values along its rail and then fixed during the testing to maintain the tension. The test rigs for bending and compres-

sive tests share most of the structures with those for the tensile tests. More details can be found in Fig. S17 and S18.

## **Supplementary Text S4 Calibration of Young's modulus**

### **Nylon string**

A 380 mm-long nylon string with a diameter of 0.55 mm was attached to the gripper of the Instron machine through two customized connectors (Fig. S6). The connectors were used to minimize the string's stress concentration caused by sharp edges of Instron's gripper to avoid early breakage. The tests were run using displacement control at a loading rate of 1 mm min<sup>-1</sup>.

### **Resin**

To obtain the Young's modulus of the resin, we printed a solid cylindrical resin sample with both diameter and height of 15 mm. During test, the sample was placed on the Instron (Fig. S7) with a loading rate of 100 N min<sup>-1</sup> to obtain the force-displacement curve. This curve was documented after several conditioning cycles to ensure data stabilization.

## **Supplementary Text S5 Determination of a string material model for use in FE model**

To create a suitable material model for the string, we collected uniaxial force-displacement data on a universal testing machine (Fig. S6). Using ABAQUS CAE software, we fit the data via a nonlinear least-squares procedure to several hyperelastic material models (Fig. S30). The Ogden material model with a  $N$  value of 3 was most stable and accurate in the displacement range of interest. The strain energy potential in the Ogden form is

$$U = \sum_{i=1}^N \frac{2\mu_i}{\alpha_i^2} \left( \bar{\lambda}_1^{\alpha_i} + \bar{\lambda}_2^{\alpha_i} + \bar{\lambda}_3^{\alpha_i} - 3 \right) + \sum_{i=1}^N \frac{1}{D_i} (J^{el} - 1)^{2i} \quad (S1)$$

where  $N$ ,  $\mu_i$ ,  $\alpha_i$ , and  $D_i$  are material parameters.  $J^{el}$  is the elastic volume ratio and  $\bar{\lambda}_i$  are the deviatoric principal stretches. The initial shear modulus is

$$\mu_0 = \sum_{i=1}^N \mu_i \quad (S2)$$

The determined values for the material parameters are given in Table S3. All values of  $D_i$  are zero, meaning that the string material is modeled as incompressible (74).

### **Supplementary Text S6 Weight sustaining of the $2 \times 2 \times 2$ cubic lattice**

This system requires an initial energy input to deploy the lattice, but once deployed, it locks into its configuration. This means that it does not require a constant energy source. The lattice can be deployed with weights or motor-driven cables to take advantage of this property. We can calculate the energy input into the system in the process of deployment. Because it is path-independent, we can simply calculate the energy of the system after deployment. There are two types of energy to be considered in the deployed lattice: strain energy and potential energy. Strain energy is the energy stored in the compression of the beam due to driving tension. This takes the form

$$U = V \frac{\sigma^2}{2E} \quad (S3)$$

where  $\sigma$  is the strain,  $E$  is the Young's modulus,  $V$  is the volume of the beads, respectively. For a beam with length  $L$  and cross-sectional area  $A$ , this reduces to

$$U = \frac{LF^2}{2EA} \quad (S4)$$

where  $F$  is the tensile force applied to the string. For our lattice, the strain energy is estimated as 0.32 J. The other energy is the potential energy, which is the energy to lift the beads off of the ground into the deployed state. This has the formula  $P = mgh$ , where  $h$  is the height of the center of mass. We calculate that by averaging the heights of all the beams in the lattice, which gives us potential energy about 0.15 J for a total energy input of  $\sim 0.47$  J.

## **Supplementary Text S7 Discussion on potential applications**

Our system's self-deployability makes it well-suited for designing machinery used in space while the tunability of mechanical properties is particularly advantageous for dynamic environments (3). For example, the flexibility of undeployed systems could simplify packing large lightweight structural lattices into tight and irregular spaces like a cargo bay on a small rocket. Once deployed on demand, our material would allow these lattices to alternate between stiffening to support high loads during maneuvers and relaxing to dissipate latent vibrations from the rocket thrust. Our system can also be used to build robots for navigating complicated terrains (41). For example, stiffness can be increased for fast movement over even surfaces, while it can be softened for traversing rough terrain or for sustaining impact (e.g., air-dropping, landing, and collision) (45, 46). Other potential applications include impact-resistant self-assembling shelters (with enclosed shells) that can be air-dropped into disaster areas to provide immediate protection and aid (43, 44). Additionally, compact vibration insulators with programmable damping can be utilized in dynamic environments, such as aerospace or automotive industries, to mitigate vibrations and improve stability and performance (45, 46). Similarly, our system can also be used in human-machine interaction (47) and medical devices (48), where self-deployability and tunability of mechanical properties are necessary.

## **Supplementary Text S8 Theoretical model**

This code describes a geometry-based model for calculating the forces and displacement on a series of beads held by a string in tension. When the beads are in contact, the system is fully defined by the local rotation and relative displacement, allowing us to calculate other interactions using the laws of sine and cosine. As Fig. S31 shows, there are three distinct modes of contact between pairs of beads: surface contact, where the faces are flush with each other; two-point contact, which occurs when the bead angle  $\theta$  is small; and one point contact, which

occurs with a large bead angle or rotation angle. Each condition provides a complete system of equations to solve for the static deflection, as the three force-balance equations ensure contact and solve for displacement and rotation. Starting at the free end, with the attached string force on the right end, you can calculate the applied contact force from the preceding bead until you get to the base. An important assumption is that all the forces are applied perfectly normal to the surface, without deformation. For each contact source, there are two input forces from the previous bead, and a force and moment to balance.

In each iteration of the loop, the deflection force is increased slightly from the previous configuration, and the initial forces in the x and y direction on the bead are calculated. Then, based on these values, the reaction forces are calculated. The resulting moment is used to move the bead, and the process is iterated until it converges. However, the forces are not continuous as the contact type changes, especially as it moves from surface to two-point contact. This is because the locus of the force changes from the center of the surface to the edge in contact in the two-point region. As a result, the model moves stepwise from stable configuration to stable configuration.

Each bead is acted on not only by the adjacent beads, but also by the string, as it is bent around the edge of the internal hole when the beads are unaligned. Static friction is also added, which has the effect of increasing the range of stable configurations before sliding is induced. By starting at the free end, the forces on each bead can be solved sequentially, never requiring more than two unknown variables.

## **Parameters**

The design of the bead took in 8 parameters, shown in Table S5.

## **Bead model**

The bead is a rigid body defined by two parallelograms, mirrored across an axis. The code uses the 8 points on the corners, which is enough to fully define the object. The relevant parameters

are  $R$ , the outer radius,  $r$ , the inner radius,  $\theta$ , the bead angle,  $w$ , the length of the bead, and  $\mu$ , the friction coefficient (Fig. S31 and Fig. S32).

The string is defined by the spring coefficient, which can be either constant or a function of length. Although the system being modeled is 3-dimensional, the cross-section at the midline almost fully describes the behavior. During one and two point contact, the contact point is in this plane, and by symmetry no force acts out of the plane. During surface contact, there is no movement until the force is concentrated at the bottom tip of each face, which also lies on the centerline. Therefore, we do not need to consider the system in the out-of-plane dimension.

In the code, the position of the bead is the location of the front tip, where the two front faces would intersect. This can be calculated from its (lower) contact point  $\vec{x}_p$ , rotation  $\phi$  and displacement from the bottom corner  $y$  relative to the prior bead. The horizontal displacement is calculated to maintain contact. For a positive displacement, which is defined in the  $-y$  direction, the bottom corner  $\vec{x}_c$  is located at

$$\vec{x}_c = \vec{x}_p - y(\cos(\theta - \phi), \sin(\theta - \phi)) \quad (\text{S5})$$

For a negative displacement, the bottom corner is the contact point. This occurs for very small bead angles, and some one point contact scenarios. From this corner at  $\vec{x}_c$ , the bead tip  $\vec{x}_t$  is calculated as

$$\vec{x}_t = \vec{x}_c + w(\cos\phi, \sin\phi) + R(\cos\phi, \sin\phi \tan\theta) \quad (\text{S6})$$

## Assembly

The bead is a class, with the parameters that define the shape along with the position of the the angle between it and the previous bead  $\phi$  and the displacement between the bottom corners  $d$ . A useful intermediate parameter  $pos$ , the location of the front tip of the bead, is calculated from the angle and displacement as well. This procedure is done iteratively, starting from the base. This can assemble the beads with any initial angle and displacement. The initial bead is set with



pos at (0, 0), with no angle or displacement. The next bead has point  $\vec{G}$  calculated according to

$$\vec{G} = \vec{x}_c - d(\cos(\theta - \phi), \sin(\theta - \phi)) \quad (\text{S7})$$

if the displacement is positive (point  $\vec{H}$  on the previous bead is above point  $\vec{G}$  on this bead) and

$$\vec{G} = \vec{x}_c - d(\cos(\theta), \sin(\theta)) \quad (\text{S8})$$

if the displacement is negative.  $\vec{H}$  is then calculated for this bead by adding  $w(\cos\phi, \sin\phi)$  to point G, and  $\vec{pos}$  is calculated by adding  $\frac{R}{\sin\theta}(\cos(\theta - \phi), \sin(\theta - \phi))$ . With  $\vec{pos}$  and  $\phi$ , all the other points that define the bead can be calculated easily. The beads are initialized like this until you have  $n_{beads}$ .

## String model

The string is initialized next. It is two arrays, each with  $2 * (n_{beads} + 2)$  elements for each opening of each hole in the system. One array is the position of the point, and the other is the location of the contact (top, bottom, or none). To determine whether there was contact, first it was determined whether the string was passing through or out of a bead. Then, the intersect function was run, which calculated the current and next possible positions (at either side, or in between the internal radius). The three relevant values were the initial value  $x_0$ , the proximate entry or exit  $x_p$ , and the subsequent exit or entry  $x_s$ . If both points on the bead at  $x_p$  were above the line between  $x_0$  and  $x_s$ , there was contact at the bottom of the bead. Similarly, if both outs on the bead at  $x_p$  were below the line between  $x_0$  and  $x_s$ , there was contact at the top of the bead. If neither of these were true, there was no contact at that location. In that case, the next intersection point was determined, and all intermediate values were set to 'none'. At the end, the distances are summed to calculate the tension. The string running through the beads is under tension, so when it is bent around a corner, it applies a force against the bead. This force can be calculated by creating a force balance at the point of contact. The angle in the string can be calculated from the adjacent string points. Assuming constant tension  $T$  and an angle of  $2\phi$  in

the string, the force is  $2 * T \cos \phi$  applied along the line of symmetry. Alternatively, you can do a vector sum of the tension forces in the string from that point to get the same answer. Whenever the system moves, a check is run to determine where the string is in contact, by checking if the string can pass cleanly from the point behind it to the point in front. The tension in the string is nonlinear and interpolated from a table of experimental values.

## Contact forces

**Surface contact.** When the beads are aligned with each other, the forces are assumed to be normal to the surface. The forces from the string and the bead to the right are applied, and the force sum in the x and y directions are calculated. Because the angles of the forces are fixed, only the magnitudes need to be solved for, giving two equations and two variables. For  $F_x$  and  $F_y$ , our system is

$$F_x = F_{top} \cos \theta + F_{bot} \cos \theta \quad (S9)$$

$$F_y = F_{top} \sin \theta - F_{bot} \cos \theta \quad (S10)$$

$F_{top}$  and  $F_{bot}$  are calculated implicitly. Then, from this the moment is calculated as

$$M = \Sigma F_x \sin F_\theta - F_y \cos F_\theta \quad (S11)$$

for forces  $\vec{F}(F, F_\theta, \vec{x})$ , where  $F$  is the magnitude,  $F_\theta$  is the angle, and  $\vec{x}$  is the position. The location of the forces are moved to balance this out, according to

$$\begin{aligned} M = & F_{top}(y - q \sin(\theta + \phi)) \cos F_\theta - F_{top}(x + q \cos(\theta + \phi)) \sin F_\theta \\ & + F_{bot}(y - q \sin(\theta + \phi)) \cos F_\theta - F_{bot}(x - q \cos(\theta + \phi)) \sin F_\theta \end{aligned} \quad (S12)$$

with  $q$  as the distance along the edge from the tip. Once it reaches the bottom and the moment is still negative, the bead is rotated proportionally based on this value, and the process iterates, moving to one or two point contact based on the bead angle. When the angle is smaller than 45 degrees, it is initially in two point contact, while it is in one-contact if the angle is larger.

**Two-point contact.** When the beads are in two point contact, the forces are applied at the points of contact and normal to the surface again. These have angles normal to the bead with rotation  $\phi$ , and are located at the contact point  $\vec{x}_p$  and the front inside corner of the top bead. The force sum components from these vectors are

$$F_x = F_{top}\cos(\theta - \phi) + F_{bot}\cos(\theta) \quad (\text{S13})$$

$$F_y = F_{top}\sin(\theta - \phi) - F_{bot}\sin(\theta) \quad (\text{S14})$$

The same force balances are calculated, and the bead is rotated based on the moment. This movement is fully defined while the system is in two point contact, as the two faces slide over each other. For a given rotation, the maximum displacement (measured as the distance along the lower side between the bead corners) is

$$disp = L - \sin(\pi - \phi - 2 * \theta) * L / \sin(2\theta) \quad (\text{S15})$$

where L is the length of the bead face,  $\phi$  is the angle between the beads, and  $\theta$  is the bead angle. This is calculated from the law of sines on the triangle of the two contact points and the crook of the bead in front.

**One-point contact.** When the beads are in one point contact, the force location is fixed to the same point. The two forces are the normal and friction force, with angles

$$F_x = F_{norm}\cos\theta + F_{fric}\cos(\theta - \frac{\pi}{2}) \quad (\text{S16})$$

$$F_y = F_{norm}\sin\theta - F_{fric}\sin(\theta - \frac{\pi}{2}) \quad (\text{S17})$$

The friction force is limited to a given fraction of the normal force, based on the friction coefficient. Therefore, it is possible to not be able to sum to 0 in the y direction. This causes the bead to slide downward, while the moment still causes rotation. This gives one point contact two

degrees of freedom for motion. Through this movement, it can return to two point contact if the downward displacement is large. The resulting minimum angle is calculated using the law of cosines for the triangle defined by the two sides and the inside angle of the bead. This gives

$$\phi = 2\theta - \arcsin((L - disp) * \sin(2\theta)/L) \quad (S18)$$

**Solver.** Once all the forces and moments were calculated, the beads were adjusted moving from the free end to the fixed end. Each bead was rotated an amount that scaled linearly with the calculated moment, and this was applied to all beads after it as well to preserve their relative angle. If, after this, a bead was found to have a rotation less than the prior bead, it was set to the prior bead's angle and the contact type set to surface. All of the changes to displacement and angle were larger for the first hundred timestep, before being reduced to 1/10 of their value for precision.

For one point contact, both the *disp* and  $\phi$  were changed based on the force in the y direction and moment, respectively. Then, it was checked if the beads were in two point contact by checking the minimum angle and displacement functions as described above. If it was two point contact, the displacement was fixed according to Eq. S15. If the force at the top point of contact was zero, the contact type was switched to 'one'. Finally, if the force sum in the y direction was not zero, the contact type was set to 'two', the displacement was calculated from the force, and the two point contact angle from Eq. S18 was applied. Under surface contact, the contact type is changed when the forces are applied beyond the edges. A sample beam with one point contact for the first bead, two point contact for the next five and surface contact for the remaining (Fig. S33).

## **Supplementary Text S9 Comparing experimental, numerical, and theoretical results.**

A theoretical model can provide valuable insights for the deflection of beams constructed with high stiffness beads (Fig. S33). To more generally explain the new metamaterial behaviors discovered in our CCPJ system, we decided that we could provide the clearest characterization using finite element techniques validated by empirical data, rather than presenting a more complex, more opaque analytical model.

In Fig. S34, we show the experimental bending force-displacement curve at an initial tension of 50N for a beam with 40-degree beads alongside the disjoint curve created by the corresponding analytical model. We also provide the force-deflection curves of finite element models having a range of elastic moduli assigned to the beads.

Our simplified theoretical model assumes perfectly rigid beads and thus could be used as an upper bound when optimizing structures with high elastic modulus bead materials. While the experimental results are characterized by a smooth transition between high and low stiffness behavior, the analytical model shows an abrupt breaking point in the force-deflection behavior. At this point, the beam undergoes a dramatic decrease in stiffness. Through finite element studies, we see that this breaking point represents an approximate limit to the deflection force a beam can sustain at high stiffness. When beads are made of a low elastic modulus material, the FE force-deflection behavior reflects the experimental results of a beam with low elastic modulus beads. As the bead elastic modulus increases, the FE force-deflection behavior approaches that of the analytical model; it develops a high initial stiffness and then transitions to a low stiffness at a breaking force. The analytical model, having perfectly rigid beads, approximates the upper limit of that breaking force.

The finite element models allow elasticity to be considered in conical bead geometries. Implementing this capability in a theoretical model would be complex as it involves nonlinear

deformation in multiple dimensions. The FE studies therefore play a key role, allowing us to vary the bead's elastic modulus and discover that the modulus has a major effect on the force-displacement behavior of the CCPJ beams.

### **Supplementary Text S10 Effect of length of beads on the mechanical properties.**

The length of the bead is an important parameter that affects the properties of the proposed metamaterials. We have run preliminary finite element simulations to show how the initial beam stiffness is affected by varying the individual bead length (Fig. S35). The total length of the unit beam is kept constant at 150 mm of unfixed length and the deflection contact is kept at 7.5 mm from the front edge of the cylindrical outer surface of the first bead. Five different scenarios are run: 15 bead (10 mm length), 10 bead (original 15 mm length), 8 bead (18.75 mm length), 6 bead (25 mm length), and 3 bead (50 mm length). These preliminary results indicate that the stiffness of the beam increases as the length of the beads increases (Fig. S36). In addition, as the reviewer points out, the flexibility of the proposed system decreases as the beads get longer. Thus, for practical applications, a designer must consider the desired stiffness vs flexibility when deciding on a bead length.

## Supplementary Figures

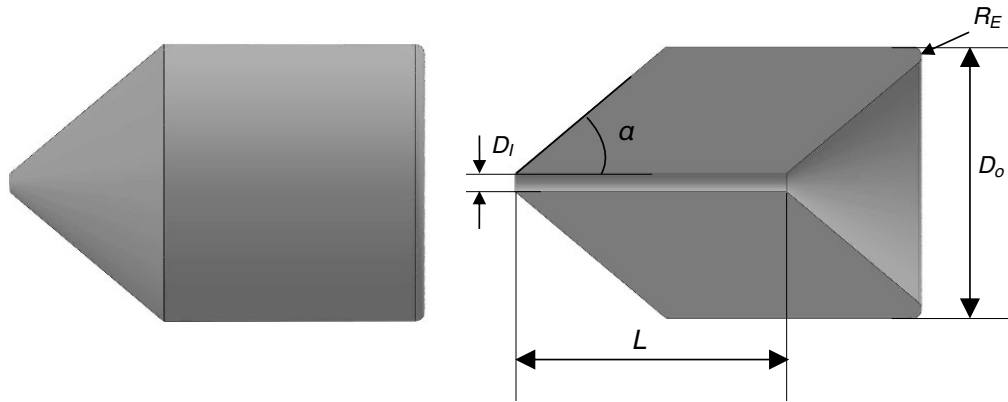

**Fig. S1. Geometry of a proposed bead with matching conical concavo–convex interfaces.**  $D_o$  is the outer diameter,  $D_I$  is the inner diameter,  $L$  is the length, and  $\alpha$  is the angle of the cone.  $R_E$  is the radius of the edge. Unless specified otherwise,  $R_E$  is set to a default value of 0 mm for fabrication.

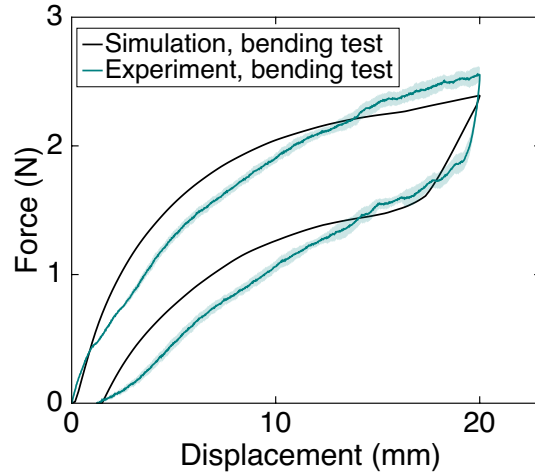

**Fig. S2. Comparison of the force-displacement curves between the FE model and experiment tests for a beam with 40° beads.** The string is pretensioned at 50 N. The shaded area represents the standard deviations between three different experimental tests.

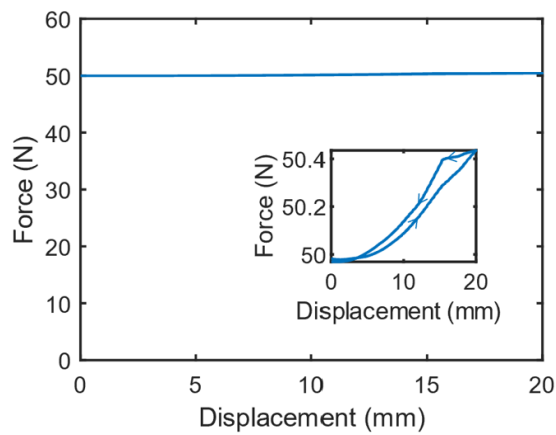

**Fig. S3. Tension variance of the string during a FE bending indentation.** The tension is recorded during a FE bending study of a beam with 40° beads after the string is initially tensioned to 50 N and then fixed in place at the free end. The displacement on the horizontal axis refers to the distance traveled by the indenter.



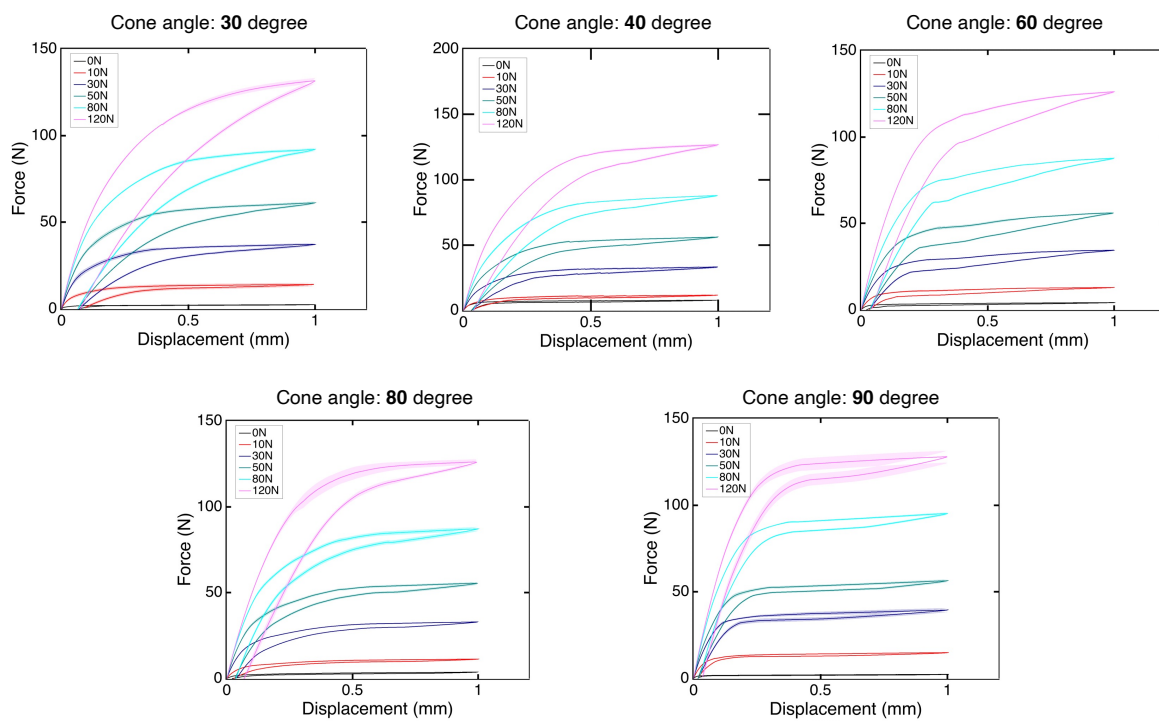

**Fig. S4. Force-displacement curves of tensile testing as a function of contracting tension over different cone angles.** The shaded areas represent the standard deviations between three different experimental tests. These tests were displacement-controlled and stopped at 1 mm of displacement.

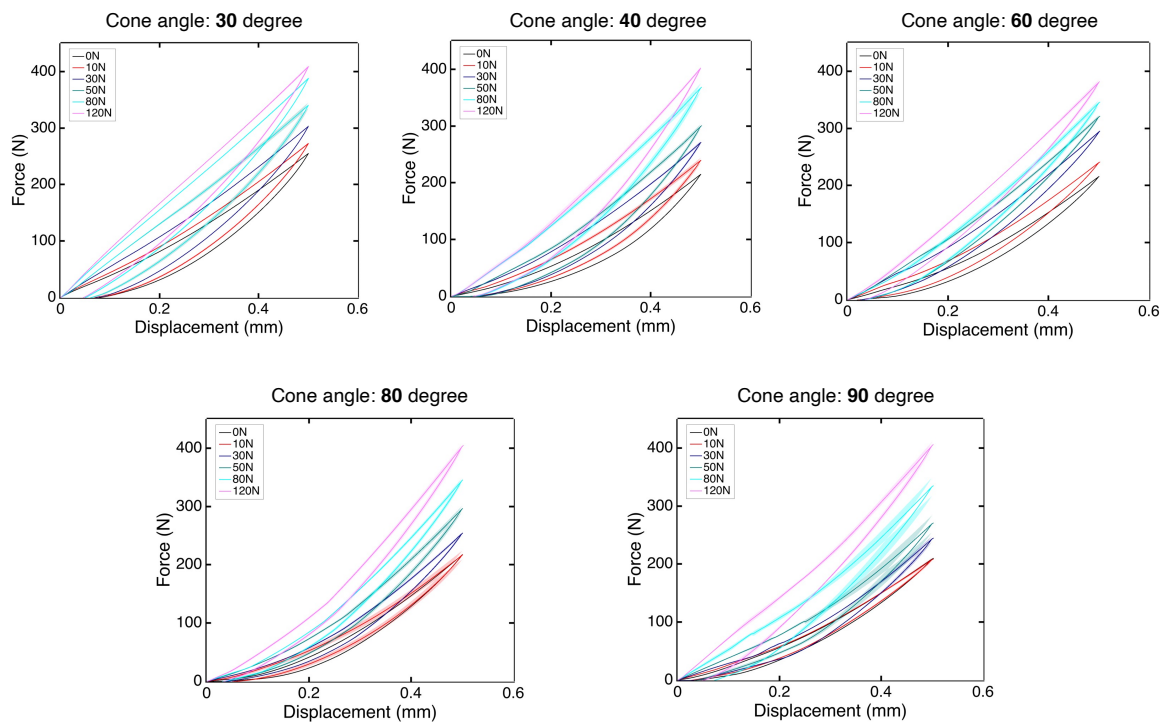

**Fig. S5. Force-displacement curves of compressive testing as a function of contracting tension over different cone angles.** The shaded areas represent the standard deviations between three different experimental tests. These tests were displacement-controlled and stopped at 0.5 mm of displacement.

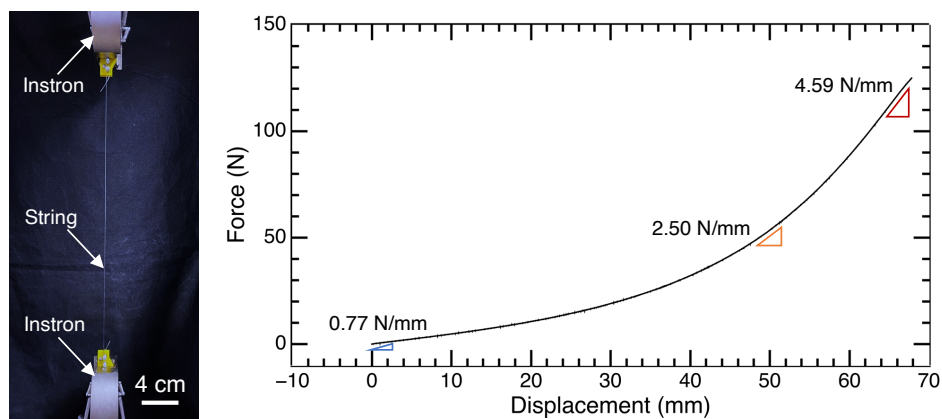

**Fig. S6. Nylon tensile test.** A 380 mm-long nylon string with a diameter of 0.55 mm was tested with its two ends attached onto Instron machine. The force-displacement curve was obtained after several training cycles.

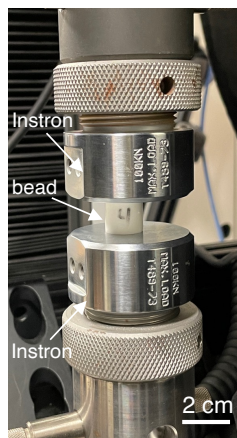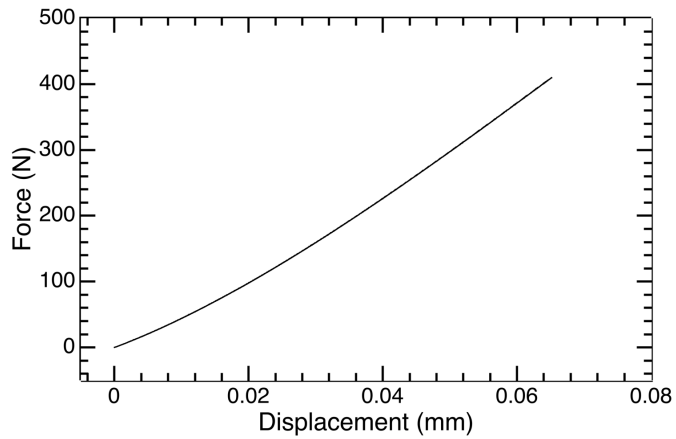

**Fig. S7. Resin compressive test.** A cylindrical resin sample with both diameter and height of 15 mm was placed on the Instron to obtain the force-displacement curve. This curve was recorded after several training cycles to stabilize the data.

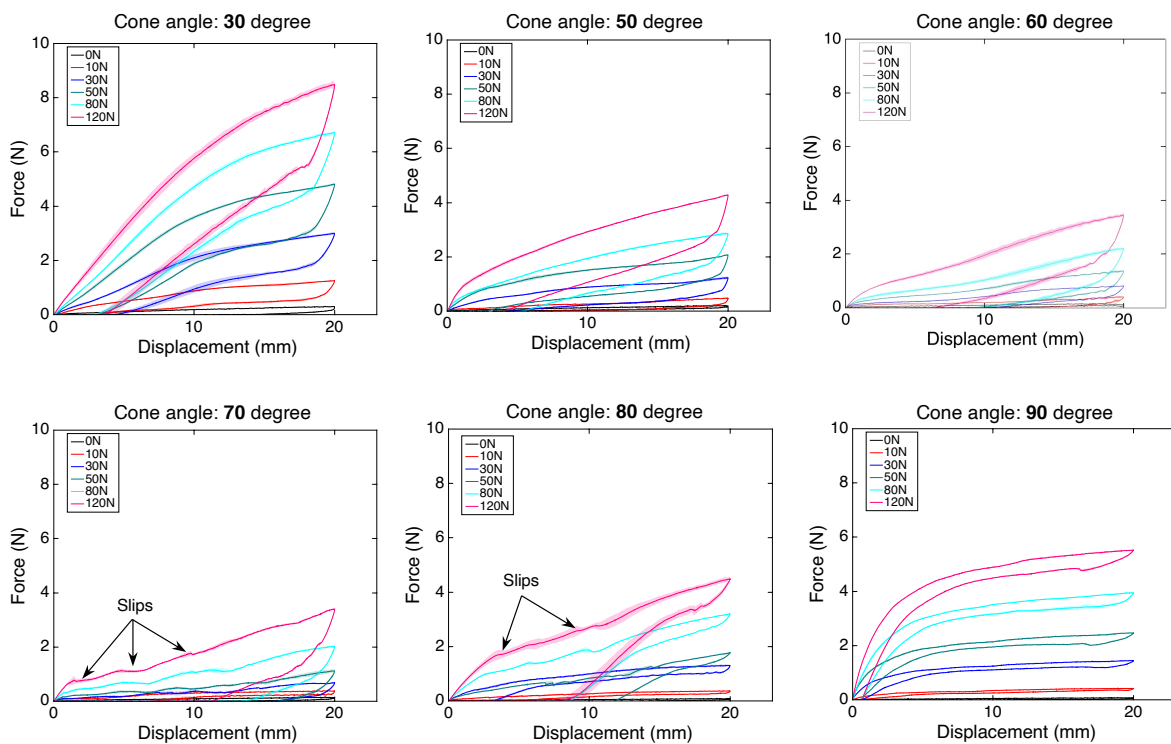

**Fig. S8. Force-displacement curves of bending testing as a function of contracting tension over different cone angles.** The shaded areas represent the standard deviations between three different experimental tests.

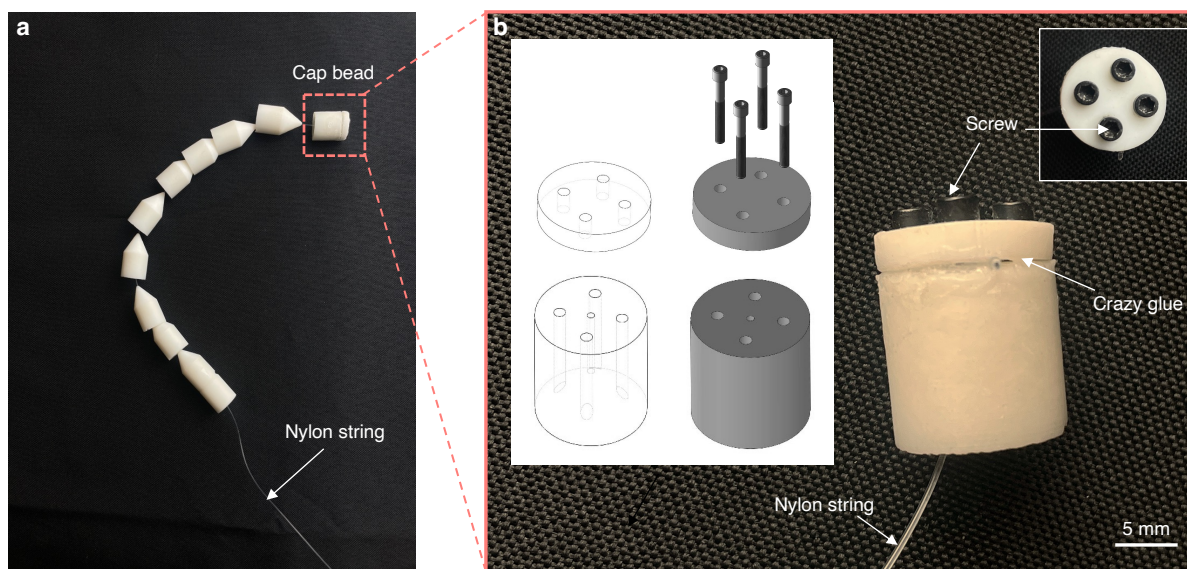

**Fig. S9. Assembly of a beam.** **a**, Image of an assembled beam with 11 beads. **b**, The assembly of the top bead. A nylon string was firstly fed through the central hole of the top bead and clamped onto it with four screws. To secure the connection between the string and top bead, crazy glue was also used, which can sustain more than 120 N pulling force on the string.

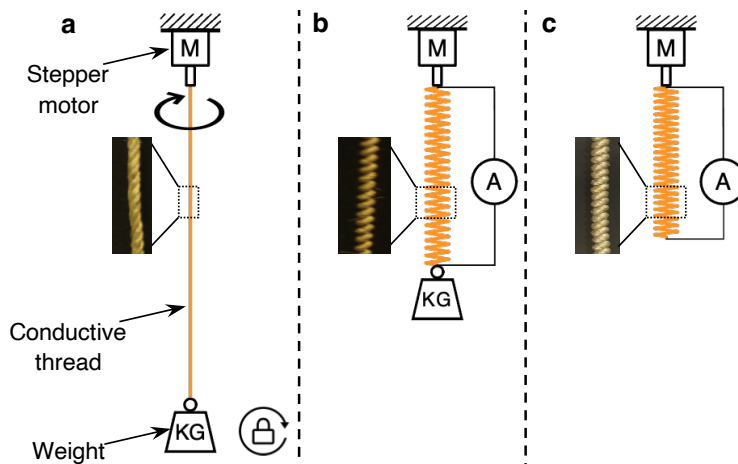

**Fig. S10. Fabrication of the super-coiled polymer actuators (SCPAs).** **a**, Implementation of coils. Under a pretension created by a hanging weight, the conductive yarn was twisted using a stepper motor to form coils. **b**, Coiled yarn annealing. The stress in the coiled yarn was relieved through a cyclic heating and cooling process, transforming it into a CSCPA actuator. **c**, Actuator Stabilization. Post weight removal, the actuator underwent a similar thermal treatment to stabilize the strain.

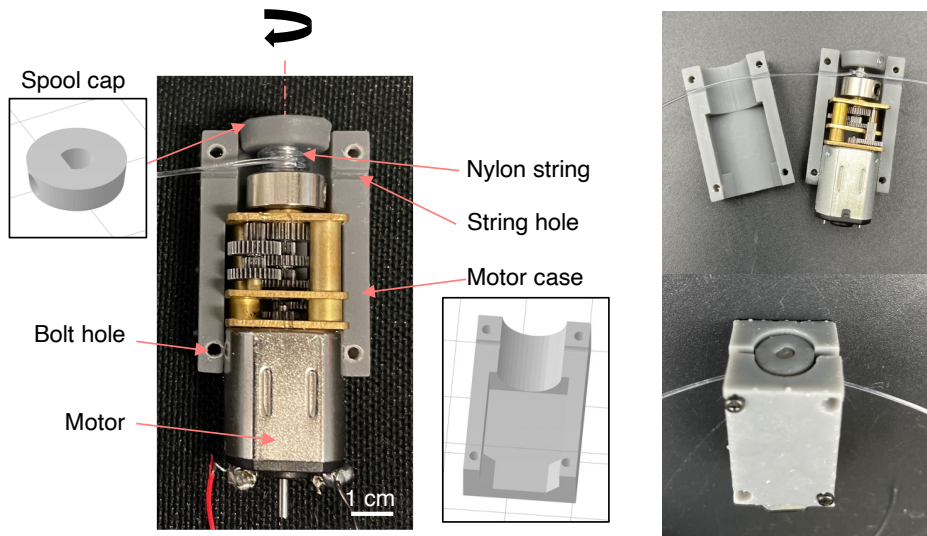

**Fig. S11. The design and assembly of a motor-driven cable (MDC) module.** A customized case was used to host the motor. A nylon string was pinched between the spool and shaft of the motor through a set screw to improve the connection strength. When powered, the shaft starts to rotate to shorten the nylon string. Owing to the small spool diameter, the MDC can output maximum tension up to  $\sim 140$  N. This output tension is sufficient for most applications in this paper.

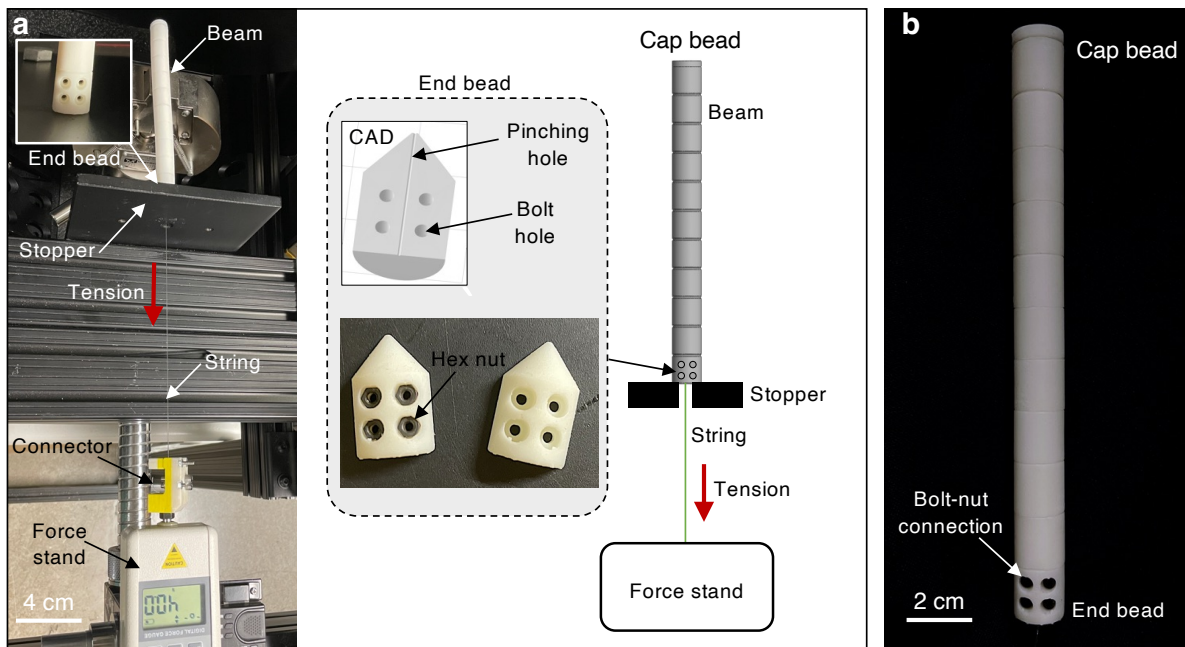

**Fig. S12. Assembly of a beam for a unit cell lattice.** **a**, The assembly setup and process. **b**, An example beam assembled with pretension of 40 N on the string.



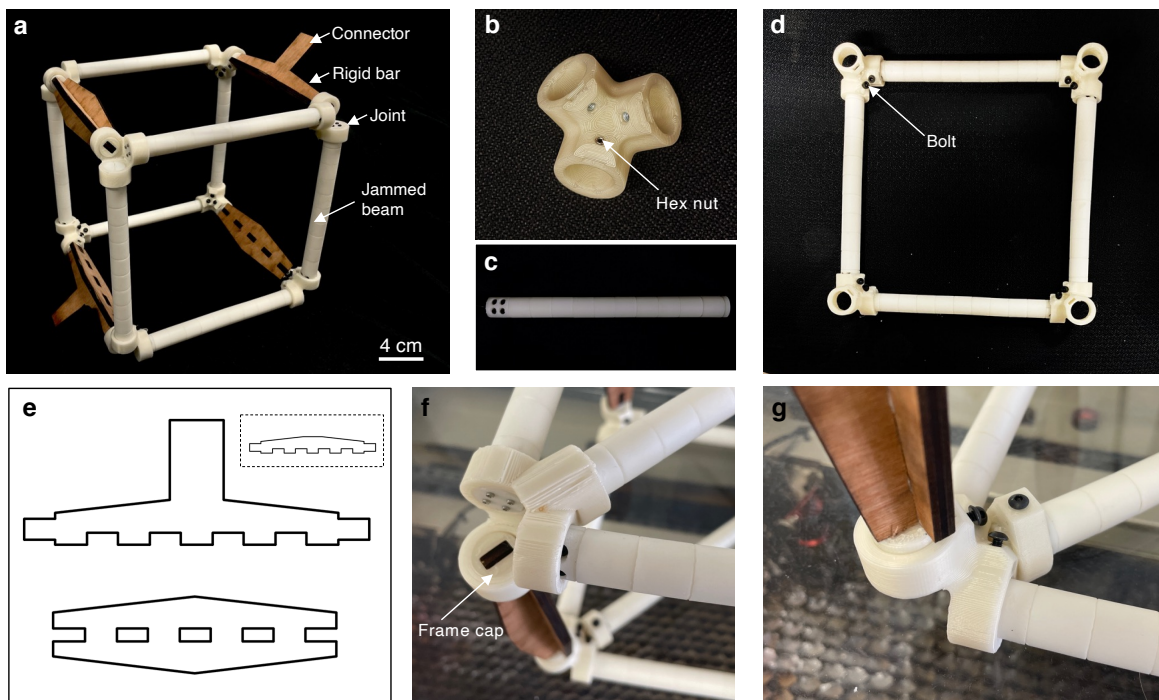

**Fig. S13. Cubic unit cell assembly.** **a**, The image of a bending-dominated lattice. **b**, The image of a joint with three Nex nuts, which are used along with bolts to fix beams. **c**, An assembled beam. **d**, Four beams are assembled into a square shape with four joints. Terminal beads of each beam are pinched on the joints by bolts. **e**, The 2D CAD files depict rigid bars designed for laser cutting. **f** and **g**, Zoom-in images of the assembled lattice, showing detailed connections.

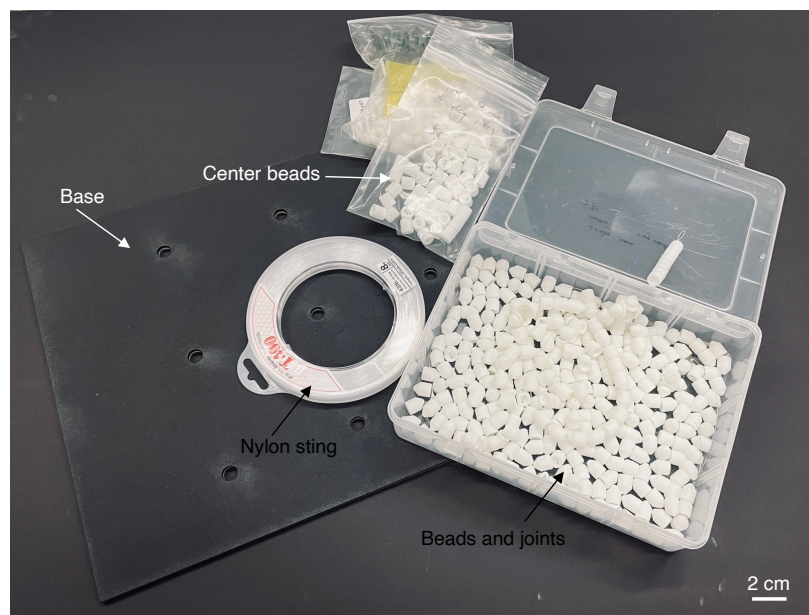

**Fig. S14. Materials for the  $2 \times 2 \times 2$  cubic lattice.** The materials include 3D printed hollow beads (and center beads), a nylon string, a rigid base, and customized resin joints.

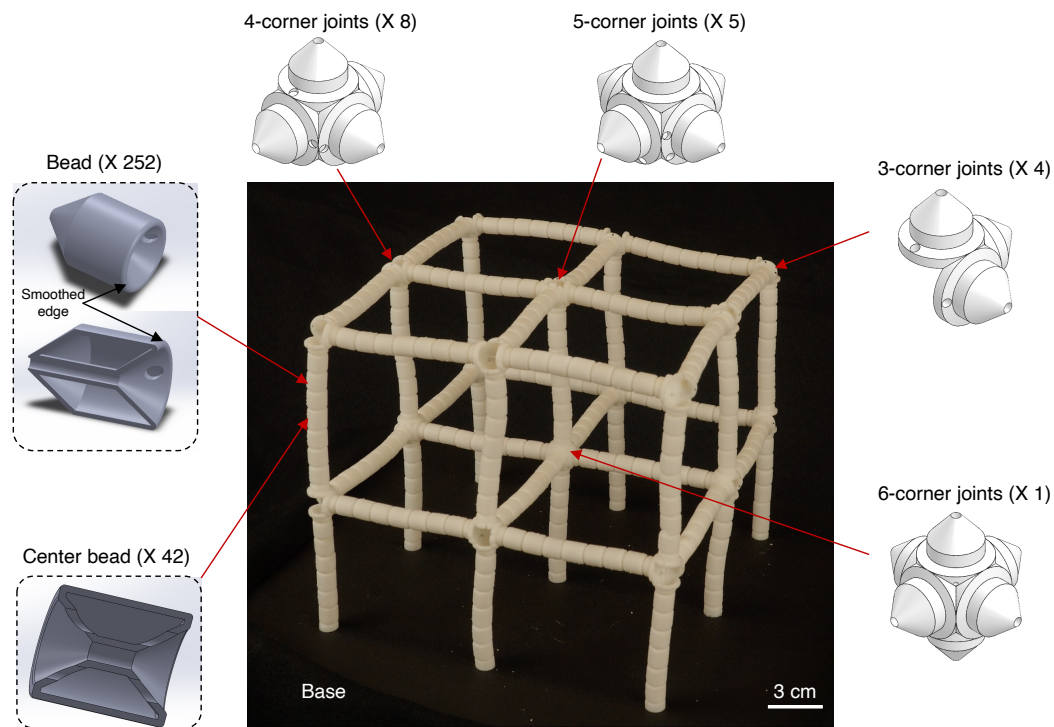

**Fig. S15. Assembly of the  $2 \times 2 \times 2$  cubic lattice.** The beams are connected with customized joints. There are in total four different joints, i.e., 3-corner joints, 4-corner joints, 5-corner joints, and 6-corner joints. For example, each 3-corner joint has three corners that are designed as cone shapes to interface with beads. These joints are assigned to different locations, as shown in the image. The base, a laser-cut acrylic board, is used to support the whole assembly. The required number of each component is noted in the parentheses. Several nylon strings were routed through all beads for actuation (Fig. S16).



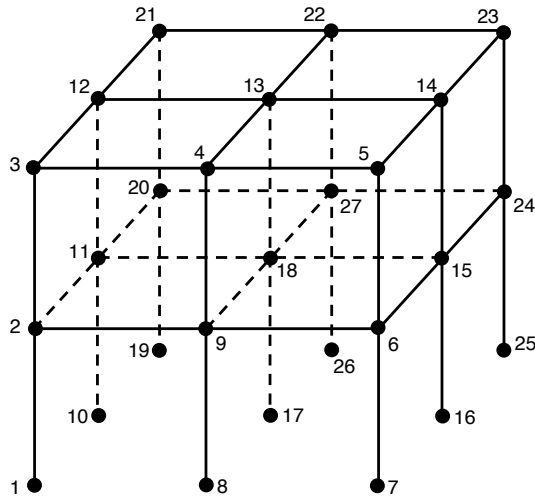

- String 1: 1→2→9→6→7
- String 2: 1→2→3→4→5→6→7
- String 3: 1→2→11→20→19
- String 4: 1→2→3→12→21→20→19
- String 5: 19→20→27→24→25
- String 6: 19→20→21→22→23→24→25
- String 7: 25→24→15→6→7
- String 8: 25→24→23→14→5→6→7
- String 9: 16→15→18→11→10
- String 10: 16→15→14→13→12→11→10
- String 11: 8→9→18→27→26
- String 12: 8→9→4→13→22→27→26
- String 13: 13→18→17

**Fig. S16. String path of the  $2 \times 2 \times 2$  lattice.** Each number represents a vertex of the lattice. One end of each string is fixed on the first vertex, while the other is free for actuation. In total, there are 13 string used to go through 27 vertexes. Taking String 1 as an example, one end of the string is fastened onto vertex 1. The other end goes through vertex 2, 9, 6, and 7 subsequently.

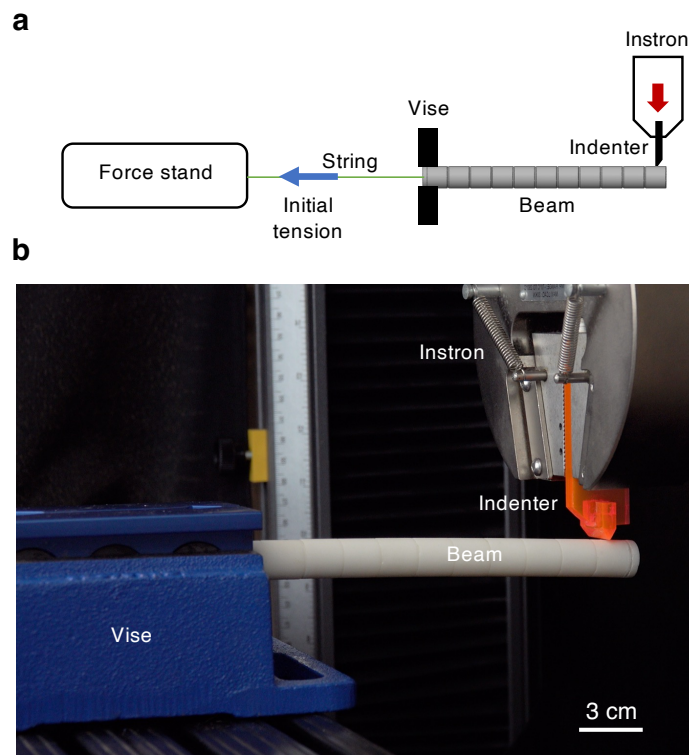

**Fig. S17. Bending testing of a CCPJ-based beam with  $40^\circ$  beads.** **a**, Testing schematic. The string is fixed onto the force stand through a rigid connector, which is not shown here. **b**, Image of the test rig. The force stand with its associated supporting frames are not shown here. The indenter is made out of acrylic plate and sufficiently rigid compared to the stiffness of the beam.

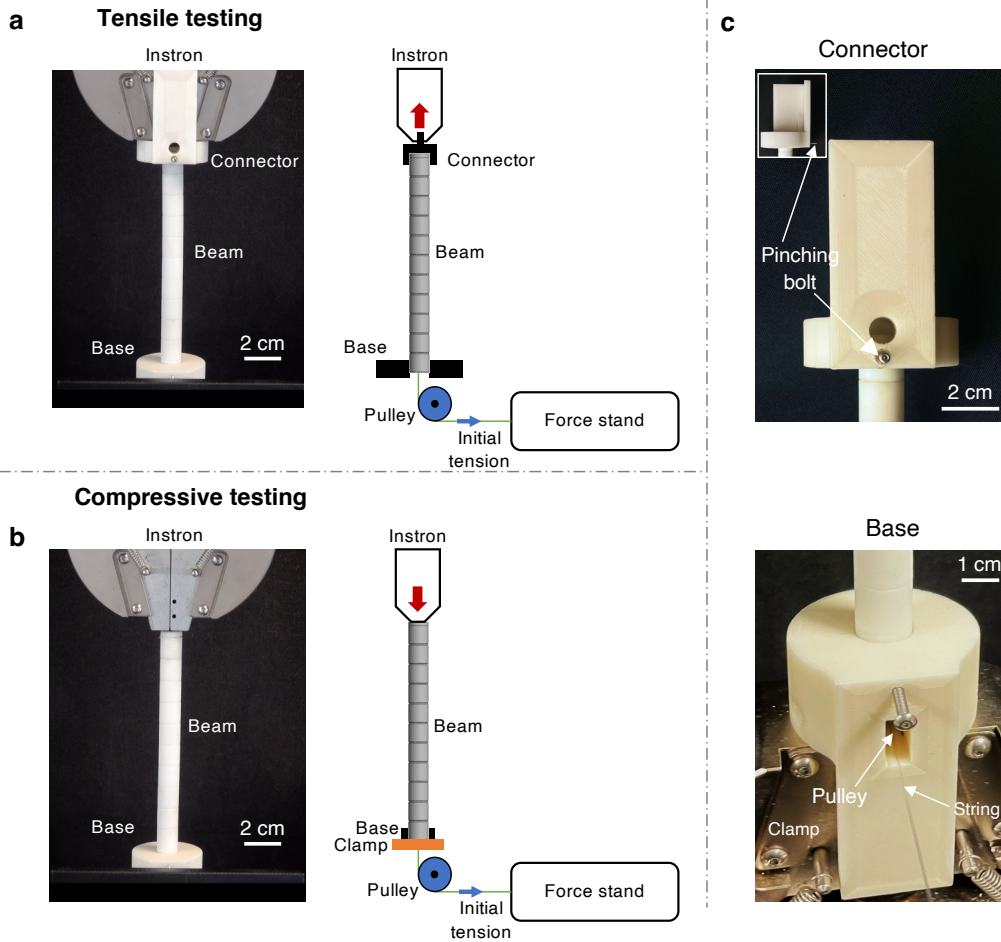

**Fig. S18. Tensile and compressive testing of a CCPJ-based beam with  $40^\circ$  beads.** **a**, The schematic for tensile testing with labeled experimental image. **b**, The schematic for compressive testing with labeled experimental image. **c**, The detailed structure of connector and base.

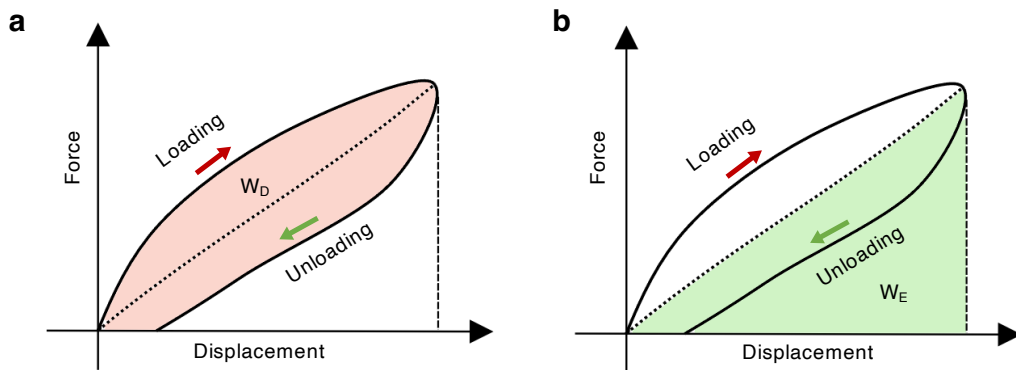

**Fig. S19. The definition of loss factor based on a force-displacement curve.** **a**, The dissipated energy  $W_D$  during the loading-unloading phase. **b**, Graphical representation of the stored energy  $W_E$ , which is approximated as the sum of the half of the  $W_D$  and the enclosed area of the unloading curve with x-axis (64).

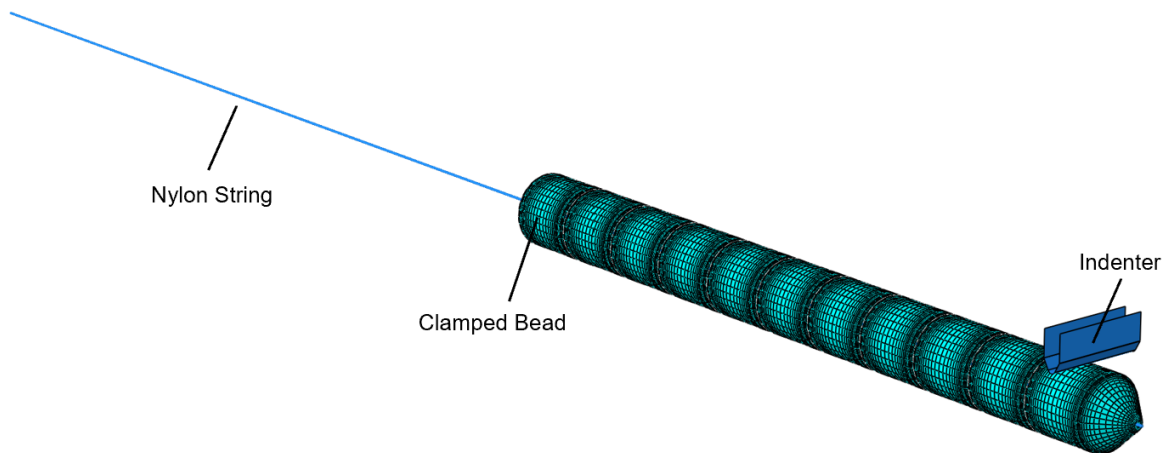

**Fig. S20. Meshed assembly of a CCPJ-based beam with  $40^\circ$  cone angles as prepared for an FE quasi-static bending analysis in ABAQUS CAE software.** Models were created at  $10^\circ$  increments for cone angles  $30^\circ$  through  $90^\circ$ .

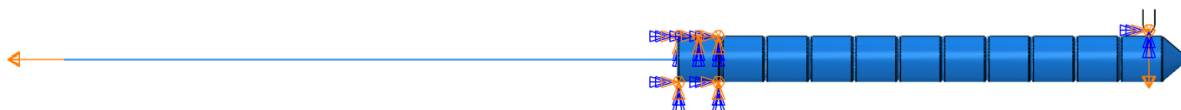

**Fig. S21. Loading conditions for the FE quasi-static bending analysis.** Orange arrows represent prescribed displacements. Blue arrows represent prescribed rotations. All prescribed values are 0 with the exception of the displacement on the left of the string and the vertical displacement on the indenter, which vary as described in Methods.

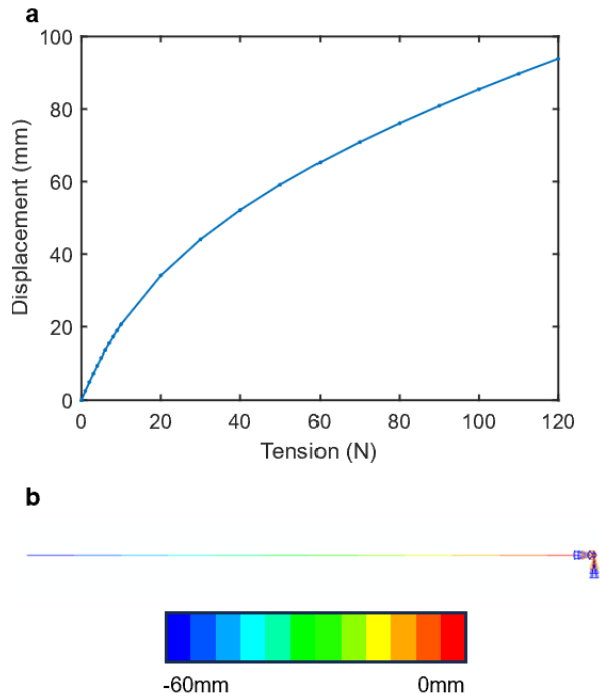

**Fig. S22. Determination of prescribed string end displacement for FE analyses.** **a**, Plot of the prescribed displacement load to be used as a function of the desired pretension load from 0 N to 120 N. **b**, Displacement plot of a 380 mm long nylon string with a 50 N tensile force applied to the left end of the string, with the right end being fixed. The same FE analysis was run for all pretension loads of interest.

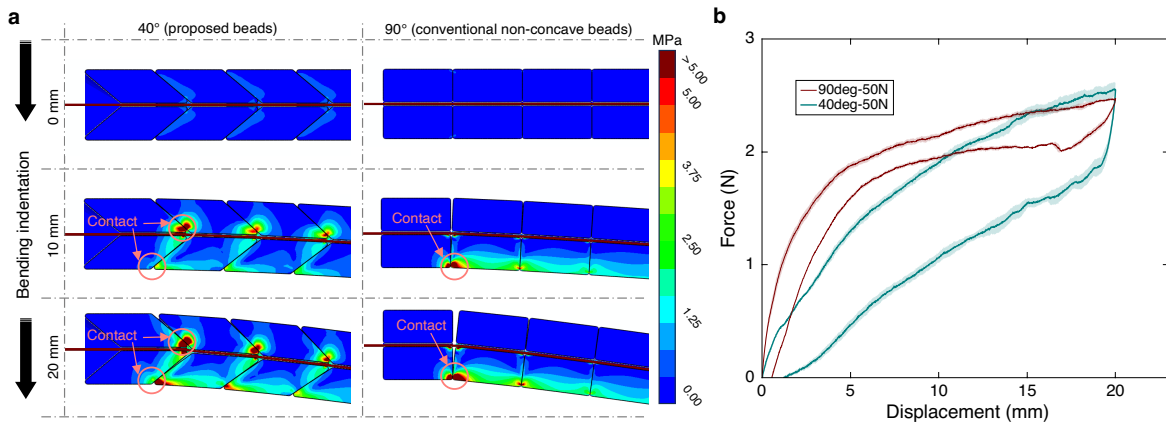

**Fig. S23. Comparison of mechanical behaviors of beams with the proposed conical and conventional non-concave interfaces.** Here, we use 40° beads to represent our proposed method, while using 90° beads to exemplify conventional non-concave beads. **a**, The displacement and stress distribution over 20 mm indentation as calculated by FE analysis. **b**, The experimentally measured force-displacement curves of both two beams. The strings are pretensioned at 50 N.

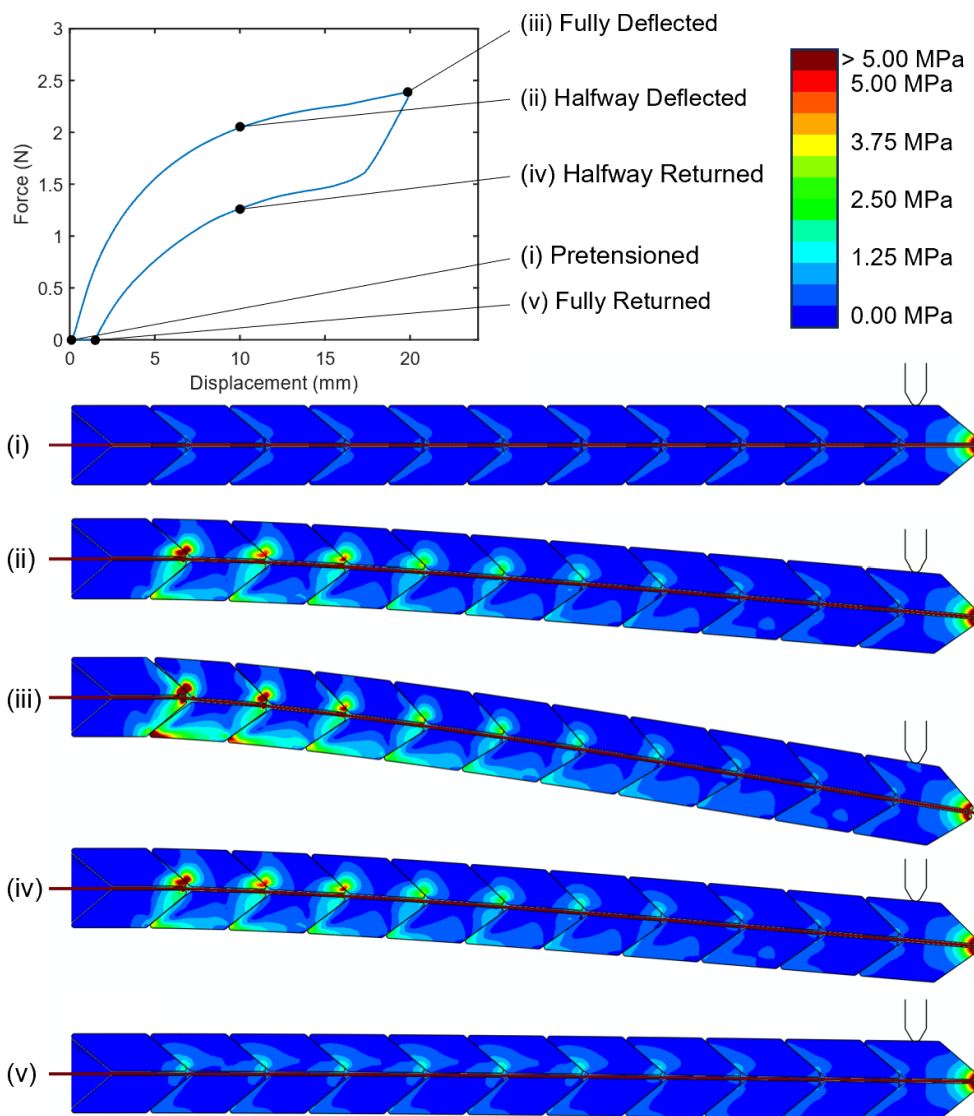

**Fig. S24. Finite element simulation of a 40° beam under a 20 mm bending indentation.** In this model, the string was pretensioned to 50 N, the beads have an edge radius of 0.05 mm, the bead material has a Young's modulus of 0.571 GPa, and the bead-to-bead friction coefficient is 0.15. A full animation can be seen in Supplemental Movie S3.

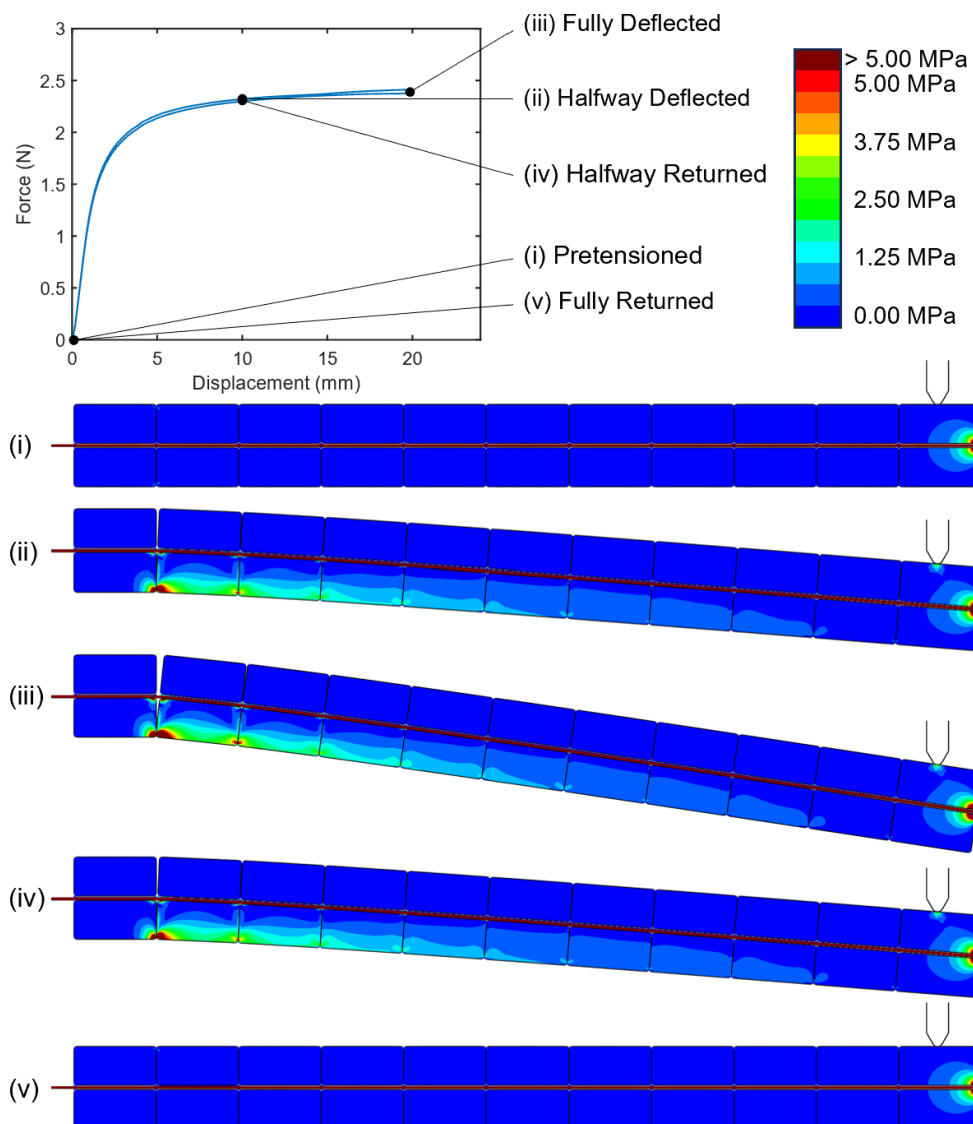

**Fig. S25. Finite element simulation of a 90° beam under a 20 mm bending indentation.** In this model, the string was pretensioned to 50 N, the beads have an edge radius of 0.05 mm, the bead material has a Young's modulus of 0.571 GPa, and the bead-to-bead friction coefficient is 0.15. A full animation can be seen in Supplemental Movie S15.

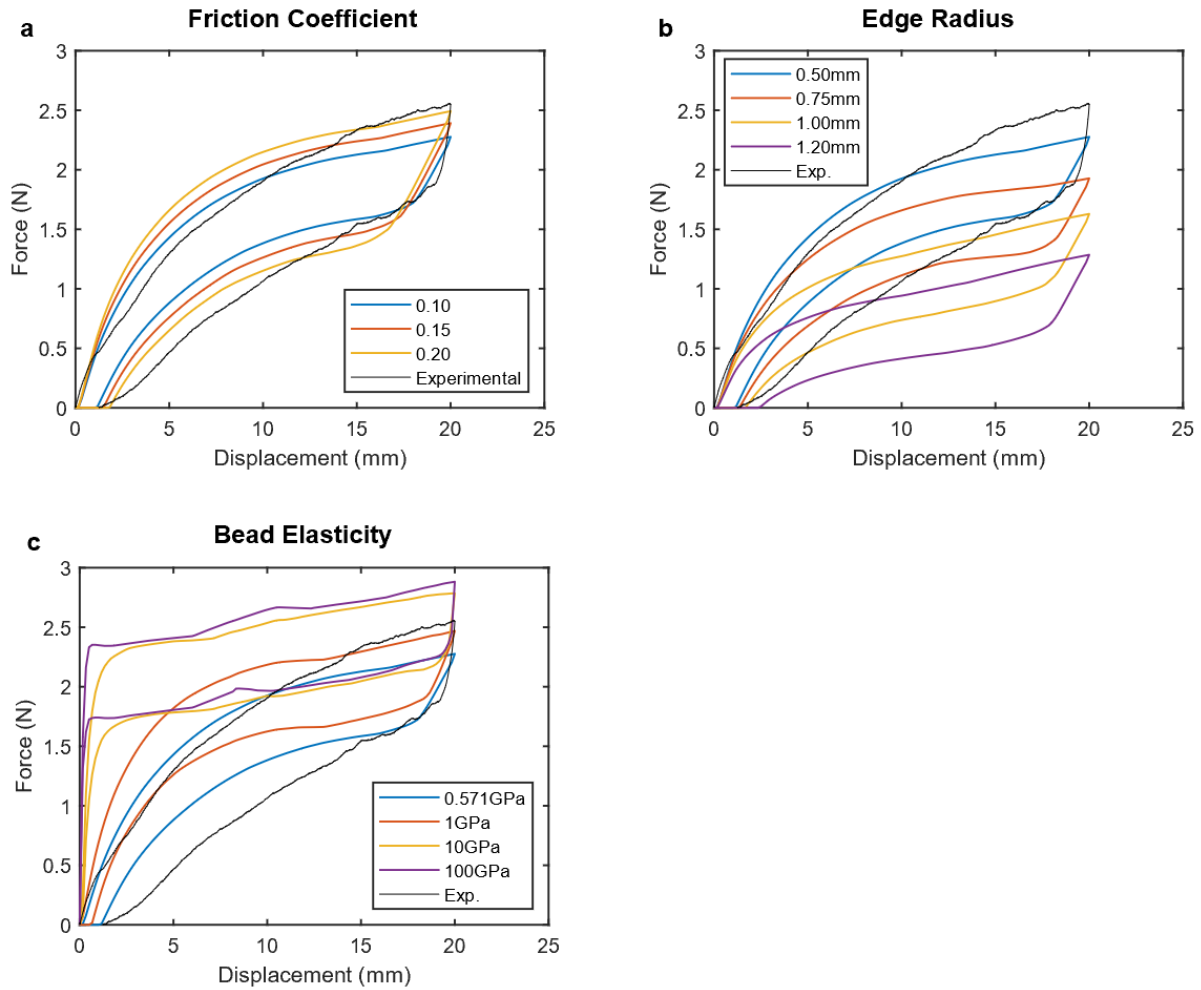

**Fig. S26. Quasistatic bending FE results showing the influence of design parameters on CCPJ beams with concavo-convex beads.** Beams are subjected to 50 N of string pretension and have  $40^\circ$  cone angle beads. Unless otherwise noted, the bead edge radius is 0.5 mm, the bead Young's modulus is 0.571 GPa and the bead-to-bead friction coefficient is 0.1. Experimental data is the average of our sample data for the 50 N string tension case. **a**, Results where the bead-bead friction coefficient is varied. **b**, Results where the bead edge radius is varied. **c**, Results where the Young's modulus of the bead material is varied.



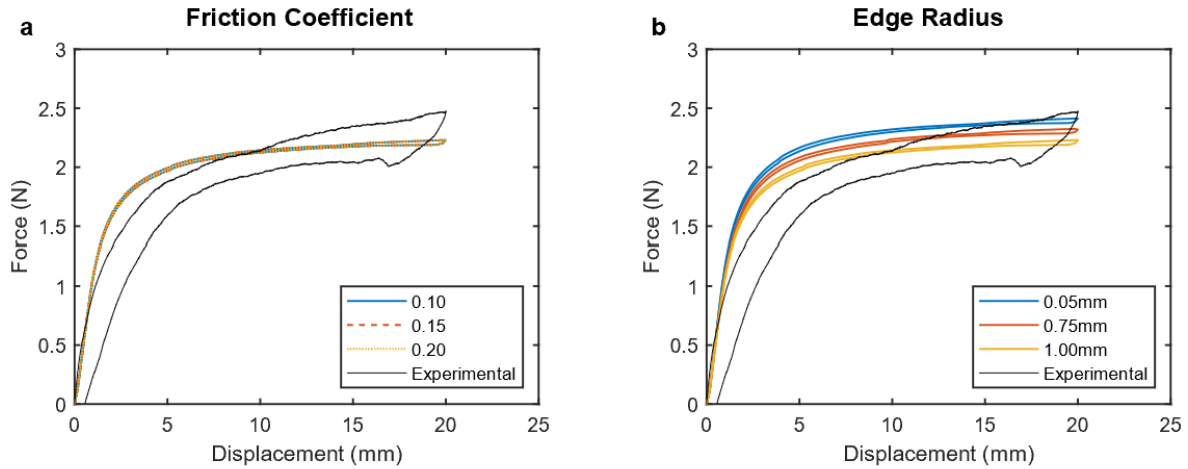

**Fig. S27. Quasistatic bending FE results showing the influence of design parameters on CCPJ beams with traditional non-concave beads.** Beams are subjected to 50 N of string pretension and have  $90^\circ$  cone angle beads. Unless otherwise noted, the bead edge radius is 0.05 mm, the bead Young's modulus is 0.571 GPa and the bead-to-bead friction coefficient is 0.1. Experimental data is the average of our sample data for the 50 N string tension case. **a**, Results where the bead-bead friction coefficient is varied. **b**, Results where the bead edge radius is varied.

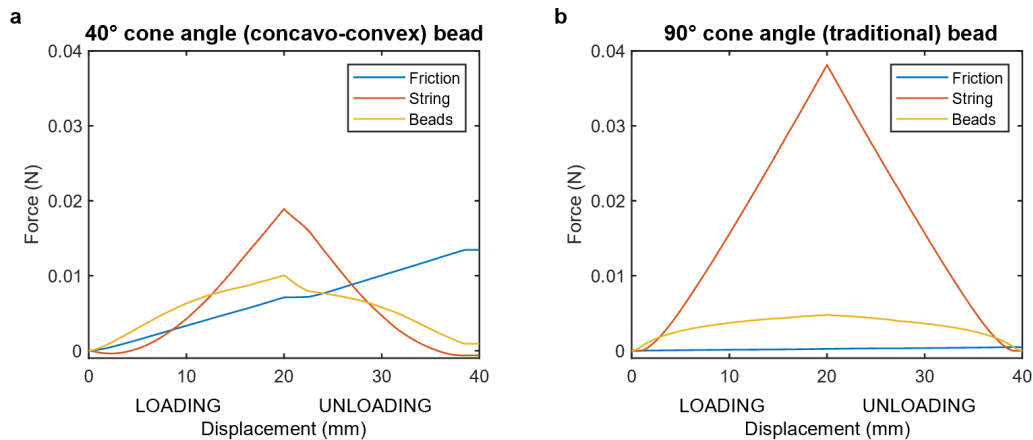

**Fig. S28. Comparison of the energy dissipated by friction, the elastic energy stored in the string, and the elastic energy stored in the beads during a 20 mm loading cycle as calculated by FE methods.** **a**, Energy distribution for concavo-convex CCPJ beams with  $40^\circ$  cone angles. **b**, Energy distribution for traditional flat CCPJ beams (with  $90^\circ$  cone angles).

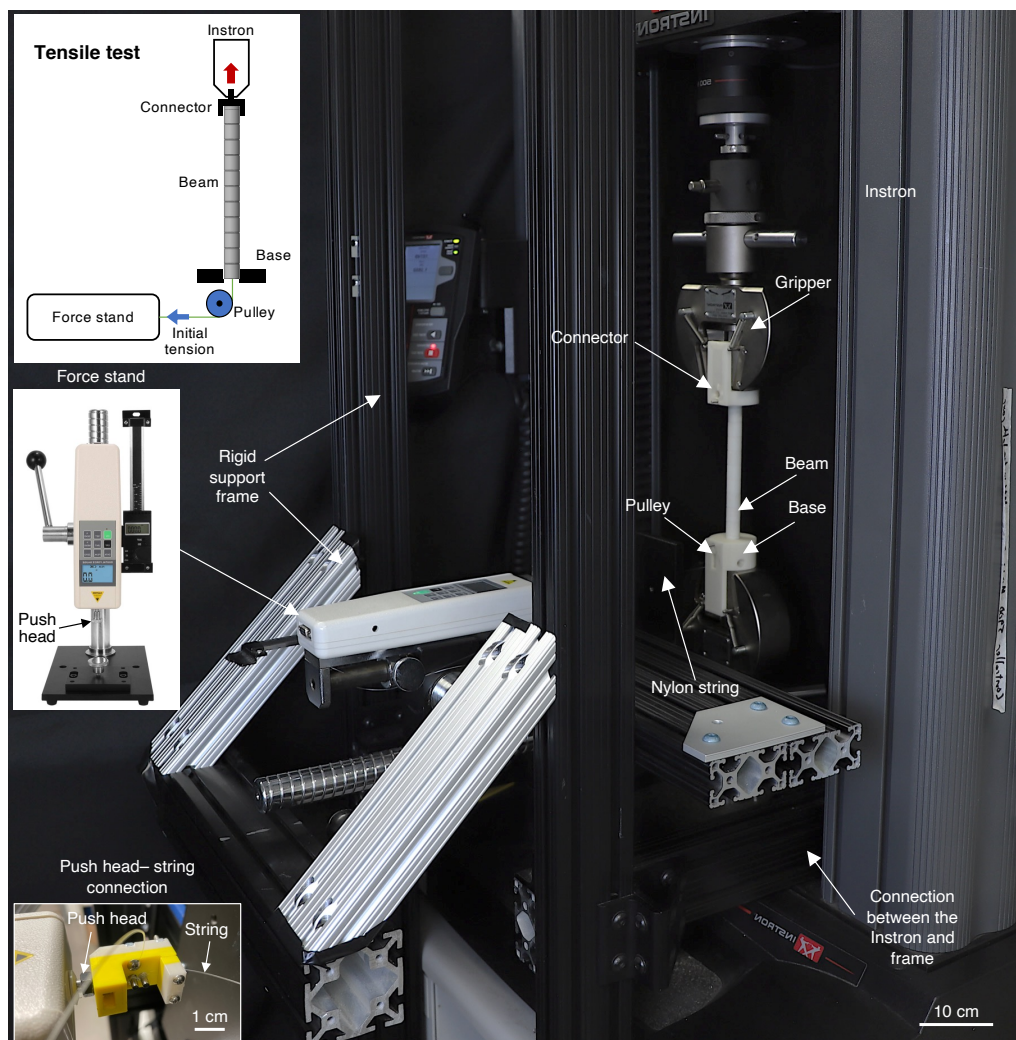

**Fig. S29. Overview of the test rig.** Here we used the setup for tensile tests as an example to show the overall structure of the system. The setups for bending and compressive tests share similar structures.

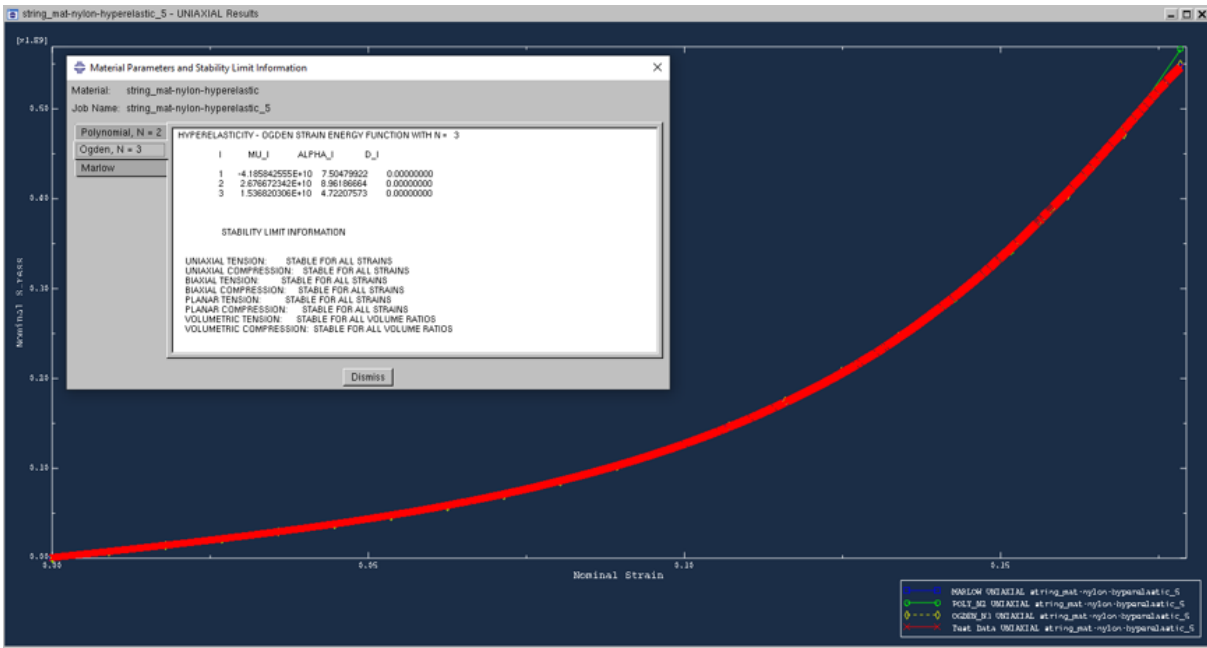

**Fig. S30.** Curve fitting of nylon string tensile data to Ogden model. Hyperelastic material models fit to the test data (red) seen in Fig. S6. Parameters for the Ogden model (yellow) in the table on the upper-left are also shown in Table S3.

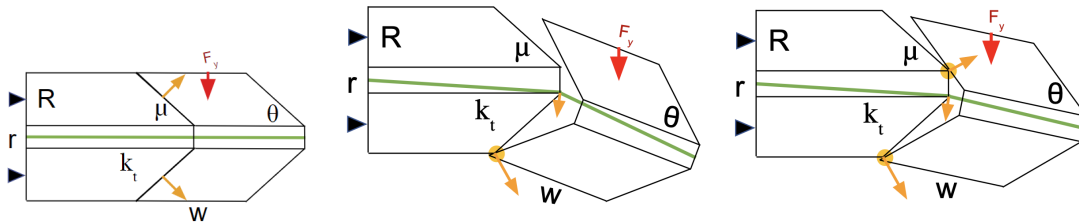

**Fig. S31.** From left to right: surface, two-point, and one-point contact between beads for theoretical model. The forces from the bead and string are in orange.  $F_y$  is the vertical loading.

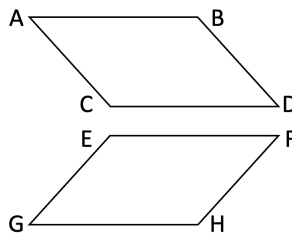

**Fig. S32.** The bead model used by the theoretical model with points labeled.

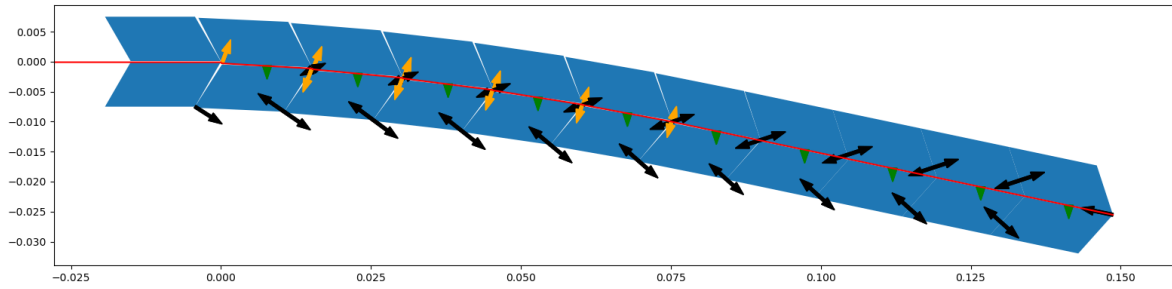

**Fig. S33.** An example of results from the theoretical model for a beam with 40-degree beads under 50 N of string pretension. Contact forces are shown in black, string forces in orange, and gravitational forces in green.

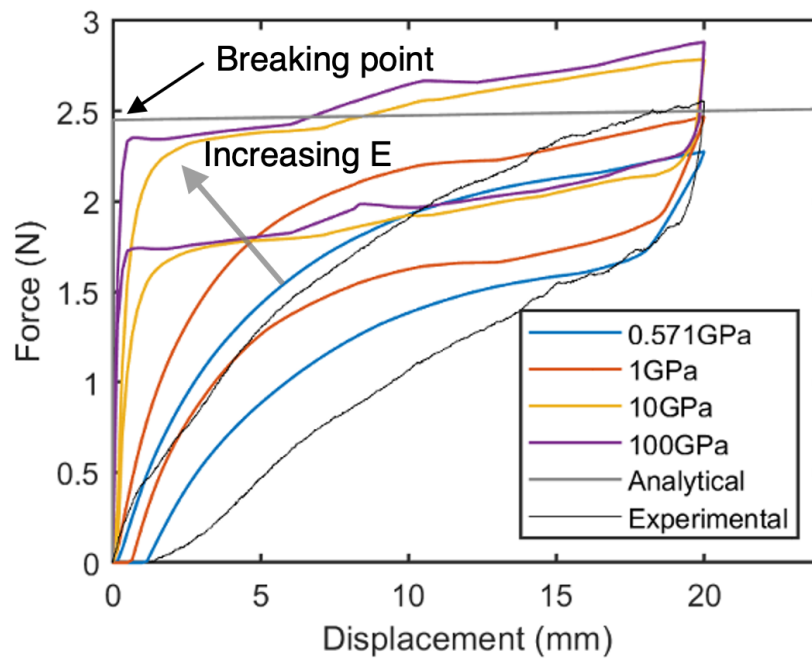

**Fig. S34.** Comparison of experimental data, numerical results, and theoretical model. Beams are subjected to 50 N of string pretension and have 40° cone angle beads.

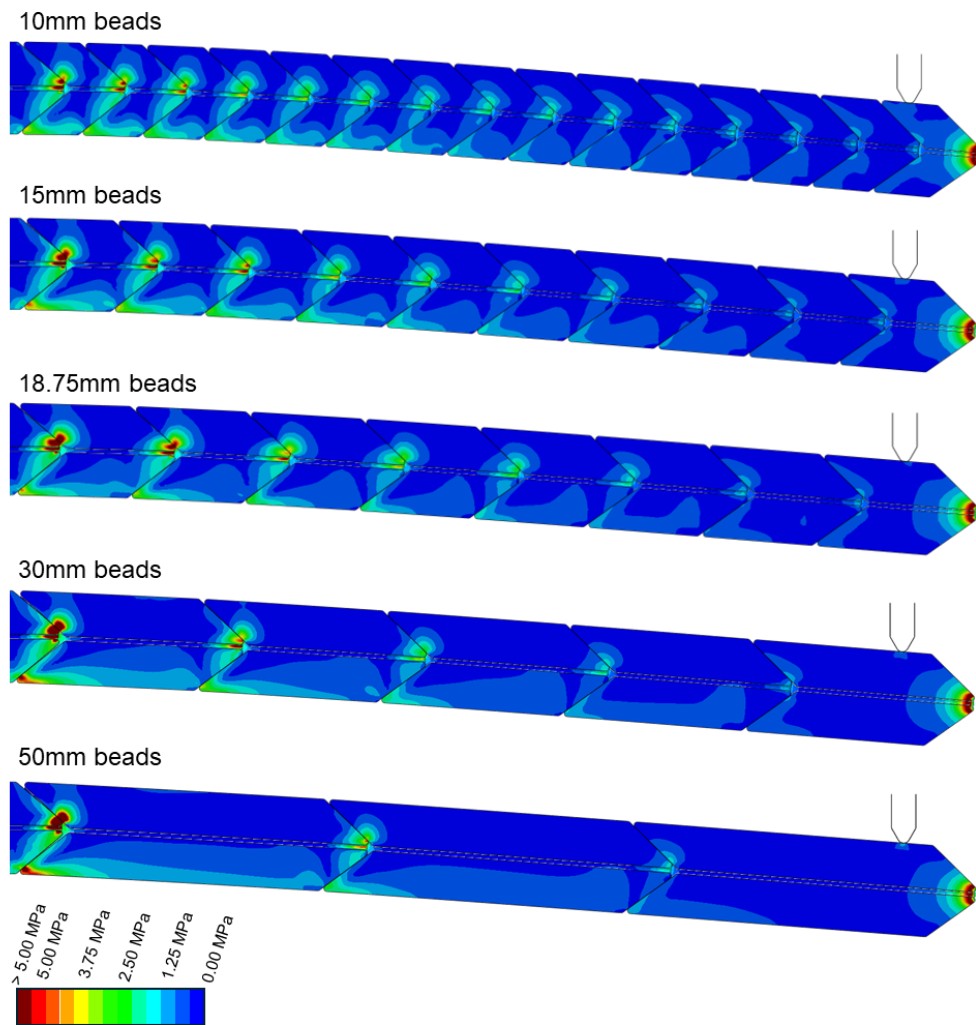

**Fig. S35.** FE simulation of CCPJ beams with different bead lengths under 10 mm of deflection. Beams are subjected to 50 N of string pretension and have 40° cone angle beads. Note that the left-most bead in each beam is held fixed.

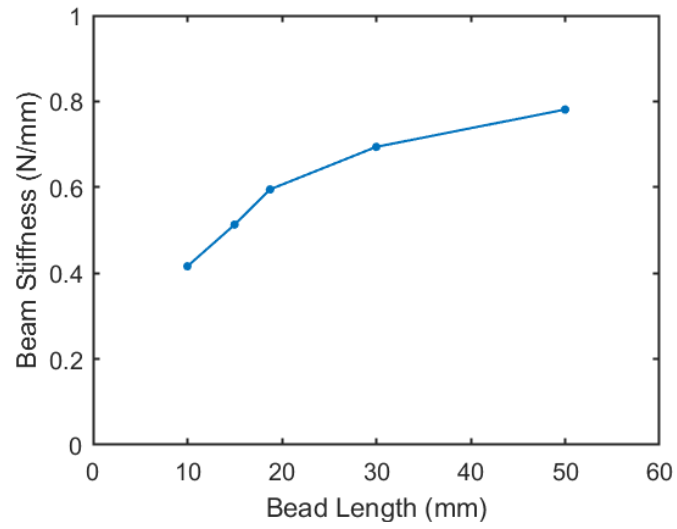

**Fig. S36.** The effect of bead length on the stiffness of a beam under bending deflection. Beams are subjected to 50 N of string pretension and have 40° cone angle beads.

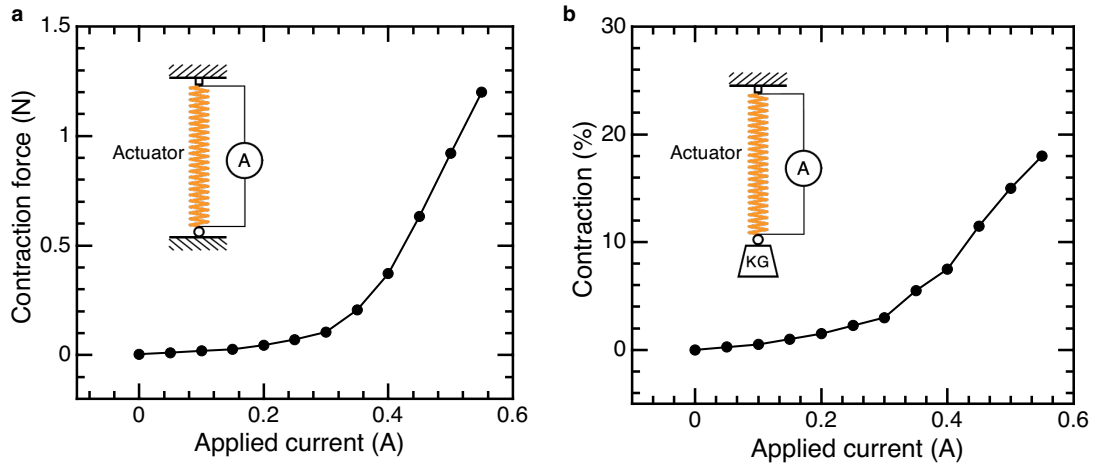

**Fig. S37. Characterization of the contraction effect of SCPAs.** **a**, The contraction force of an SCPA as a function of the applied current. Both ends of the actuator are fixed. **b**, The contraction of an SCPA as a function of the applied current. The applied pretension is 175 grams. The length of the tested actuator is 50 mm.

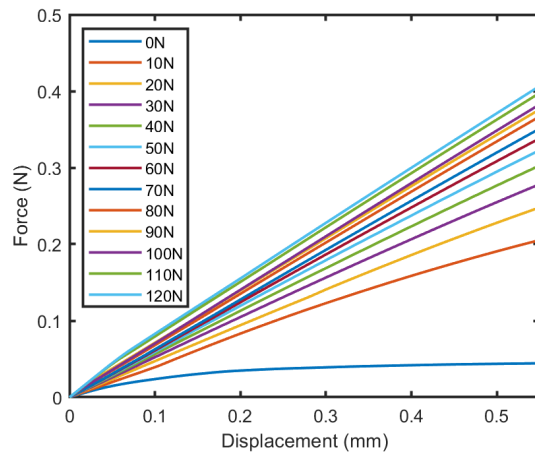

**Fig. S38. Force-displacement curves of quasistatic bending from FE models with varying pretension.** Beams are constructed of  $40^\circ$  cone angle beads. The topmost curve corresponds to the 120N pretension with each lower curve corresponding to the next lower pretension load.



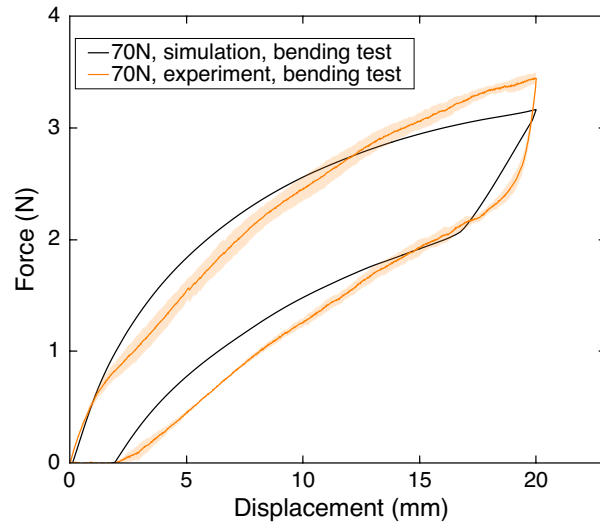

**Fig. S39. Comparison of the force-displacement curves between the FE model and experiment tests for a beam with 40° beads.** The string is pretensioned at 70 N. The shaded area represents the standard deviations between three different experimental tests.

## Supplementary Tables

**Table S1. The set of parameters of the beam for mechanical properties characterization.**

| Parameters               | Unit | Value                     |
|--------------------------|------|---------------------------|
| <i>Bead :</i>            |      |                           |
| Number                   |      | 11                        |
| Length ( $L$ )           | mm   | 15.0                      |
| Outer diameter ( $D_O$ ) | mm   | 15.0                      |
| Inner diameter ( $D_I$ ) | mm   | 0.78                      |
| Cone angle ( $\alpha$ )  | °    | 40                        |
| Young's modulus          | GPa  | 0.571                     |
| Poisson's ratio          | 1    | 0.4                       |
| <i>Nylon string :</i>    |      |                           |
| Length ( $x_0$ )         | mm   | 380.0                     |
| Diameter ( $d$ )         | mm   | 0.55                      |
| Young's modulus          | GPa  | see Supplementary Text S5 |
| Poisson's ratio          | 1    | 0.4                       |

**Table S2. Comparison of the apparent bending modulus and loss factor between FE model and experiment for 40° beads.**

|                                | Experiment | FE model (CoF <sup>1</sup> ) | Discrepancy (%) |
|--------------------------------|------------|------------------------------|-----------------|
| Apparent bending modulus (MPa) | 229.9      | 216.6 (0.10)                 | -5.8            |
|                                |            | <b>242.6 (0.15)</b>          | <b>+5.5</b>     |
|                                |            | 263.0 (0.20)                 | 14.4            |
| Loss factor                    | 0.54       | 0.34 (0.10)                  | -37.0           |
|                                |            | <b>0.47 (0.15)</b>           | <b>-13.0</b>    |
|                                |            | 0.59 (0.20)                  | +9.3            |

<sup>1</sup> CoF represents the coefficient of friction between beads. The chosen value of CoF for FE simulation is 0.15 (in bold).

**Table S3. Parameters for Ogden hyperelastic material model of nylon string used in FE model.**

| $i$ | $\mu_i$                 | $\alpha_i$ | $D_i$ |
|-----|-------------------------|------------|-------|
| 1   | $-4.185 \times 10^{10}$ | 7.504      | 0     |
| 2   | $2.676 \times 10^{10}$  | 8.961      | 0     |
| 3   | $1.536 \times 10^{10}$  | 4.722      | 0     |

**Table S4. Taxonomy of tendon-driven particle jamming mechanisms<sup>1</sup>.**

|           | Self-deployment <sup>2</sup> | Precise alignment <sup>3</sup> | 2D metamaterials <sup>4</sup> | 3D metamaterials <sup>5</sup> | Tunable stiffness | Tunable damping |
|-----------|------------------------------|--------------------------------|-------------------------------|-------------------------------|-------------------|-----------------|
| Our work  | ✓                            | ✓                              | ✓                             | ✓                             | ✓                 | ✓               |
| Ref. (49) | ✓                            | ✗                              | ✗                             | ✗                             | ✓                 | ✗               |
| Ref. (61) | ✗                            | ✗                              | ✓                             | ✗                             | ✗                 | ✗               |
| Ref. (51) | ✓                            | ✗                              | ✓                             | *<br>✓                        | ✓                 | ✗               |
| Ref. (50) | ✗                            | ✗                              | ✗                             | ✗                             | ✓                 | ✗               |

Note: 1: Here, we only list representative mechanisms, excluding traditional vacuum-driven particle jamming. 2: The systems can be deployed from compact states to preprogrammed states without requiring additional actuation or manual manipulations. 3: The deployed systems should have small alignment offsets. 4: 2D lattice structures. 5: 3D lattice structures. \*: This work generates 2D surfaces in a 3D space.

**Table S5. System parameters of bead model.**

| <b>Symbol</b> | <b>Value</b> | <b>unit</b> | <b>Description</b>                  |
|---------------|--------------|-------------|-------------------------------------|
| $R$           | 7.5 2        | mm          | Outer radius                        |
| $r$           | 0.1          | mm          | Inner radius                        |
| $w$           | 1.5          | cm          | Bead length                         |
| $\theta$      | $4\pi/18$    | rad         | Bead angle (here 40 deg)            |
| $\mu$         | 0.1          | -           | Friction coefficient                |
| $\rho$        | 1000         | $kg/m^3$    | Bead density                        |
| $n_{beads}$   | 10           | -           | Number of beads (not counting base) |
| $T_s$         | 50           | N           | Initial tension in string           |

## **Description of Supplementary Movies**

File name: Supplementary Movie S1

Description: Self-deployment and mechanical properties manipulation of a unit beam.

File name: Supplementary Movie S2

Description: Bending test of a beam composed of eleven resin beads with  $40^\circ$  cone angle. The initial tension on the string is 50 N.

File name: Supplementary Movie S3

Description: Cross-section side view of the von Mises stress plot animation of a beam constructed of eleven  $40^\circ$  beads in a finite element model bending test. The contracting tension is 50 N.

File name: Supplementary Movie S4

Description: Tensile test of a beam composed of eleven resin beads with  $40^\circ$  cone angle. The contracting tension is 50 N.

File name: Supplementary Movie S5

Description: Compressive test of a beam composed of eleven resin beads with  $40^\circ$  cone angle. The contracting tension is 50 N.

File name: Supplementary Movie S6

Description: Cable-driven self-deployment tests of resin beams against gravity.

File name: Supplementary Movie S7

Description: Compressive test of unit cells (both bending- and stretching-dominated) composed of beams with  $40^\circ$  resin beads. The contracting tension is 40 N.

File name: Supplementary Movie S8

Description: Self-deployment/collapse of a beam with 40° resin beads, activated by a motor-driven cable.

File name: Supplementary Movie S9

Description: Self-deployment/collapse of a beam with 90° plywood beads, activated by an electrically driven artificial muscle, super-coiled polymer actuator.

File name: Supplementary Movie S10

Description: Self-deployment/collapse of a cubic lattice composed of with 90° plywood beads and electrically driven artificial muscles—super-coiled polymer actuators.

File name: Supplementary Movie S11

Description: Self-deployment, loading-bearing, and self-collapse of a metamaterial composed of an arrangement of  $2 \times 2 \times 2$  cubic unit cell.

File name: Supplementary Movie S12

Description: Self-deployment, mechanical property tuning, and self-collapse of a metamaterial composed of an arrangement of  $2 \times 2 \times 2$  cubic unit cell.

File name: Supplementary Movie S13

Description: View of the von Mises stress plot animation of a beam constructed of eleven 40° beads in a finite element model bending test. The contracting tension is 50 N.

File name: Supplementary Movie S14

Description: View of the von Mises stress plot animation of a beam constructed of eleven 90° beads in a finite element model bending test. The contracting tension is 50 N.

File name: Supplementary Movie S15

Description: Cross-section side view of the von Mises stress plot animation of a beam constructed of eleven  $90^\circ$  beads in a finite element model bending test. The contracting tension is 50 N.

File name: Supplementary Movie S16

Description: Bending test of a beam composed of eleven resin beads with  $90^\circ$  cone angle. The initial tension on the string is 50 N.
